# Supplementary material for: Sotagliflozin in Combination With Optimized Insulin Therapy in Adults With Type 1 Diabetes: The North American inTandem1 Study
Source: Oxford University Press journal article supplement (doi:10.2337/dc18-0343), 2018-06-24

**Supplement to**

**Sotagliflozin in Combination with Optimized Insulin Therapy in Adults with Type 1**

**Diabetes: The North American inTandem1 Study**

John B. Buse<sup>1</sup>, Satish K. Garg<sup>2</sup>, Julio Rosenstock<sup>3</sup>, Timothy S. Bailey<sup>4</sup>, Phillip Banks<sup>5</sup>, Bruce W. Bode<sup>6</sup>, Thomas Danne<sup>7</sup>, Jake A. Kushner<sup>8</sup>, Wendy S. Lane<sup>9</sup>, Pablo Lapuerta<sup>5</sup>, Darren K. McGuire<sup>10</sup>, Anne L. Peters<sup>11</sup>, John Reed<sup>12</sup>, Sangeeta Sawhney<sup>5</sup>, and Paul Strumph<sup>5</sup>

**Principal Investigators List**

Andrew Ahmann, Oregon Health & Science University, Portland, OR, USA; Buki Ajala, LMC Diabetes and Endocrinology, Calgary, Alberta, Canada; Laura Akright, Northeast Endocrinology Associates, PA, Schertz, TX, USA; Amer Al-Karadsheh, The Endocrine Center Research Consultants, Houston, TX, USA; Hani Alasaad, LMC Diabetes and Endocrinology, Barrie, Ontario, Canada; Stephen Aronoff, Research Institute of Dallas, , Dallas, TX, USA; Ronnie Aronson, LMC Diabetes and Endocrinology, Toronto, Ontario, Canada; Timothy Bailey, AMCR Institute, Inc., Escondido, CA, USA; Arti Bhan, Henry Ford Hospital, Detroit, MI, USA; Bruce Bode, Atlanta Diabetes Associates, Atlanta, GA, USA; John Buse, UNC Health Care System, Chapel Hill, NC, USA; Tira Chaica Brom, Texas Diabetes and Endocrinology, Austin, TX, USA; Mark Christiansen, Diablo Clinical Research, Walnut Creek, CA, USA; Elena Christofides, Endocrinology Associates, Inc, Columbus, OH, USA; Jay Cohen, The Endocrine Clinic, PC, Memphis, TN, USA; Thomas Elliott, Vancouver General Hospital, Vancouver, BC, Canada; Norman Fishman, Diabetes Endocrinology Specialists, Inc., Chesterfield, MO, USA; David Fitz-Patrick, East-West Medical Research Institute, Honolulu, HI, USA; Juan Pablo, Frias, National Research Institute, Los Angeles, CA, USA; Satish Garg, Barbara Davis Center, University of Colorado Denver, Aurora, CO; USA; W. Timothy Garvey, University of Alabama at Birmingham, Birmingham, AL, USA; Linda Gaudiani, Marin Endocrine Care and Research, Inc., Greenbrae, CA, USA; Gregg Gerety, AMC Division of Community Endocrinology, Albany, NY, USA; Ronald Goldenberg, LMC Diabetes and Endocrinology, Thornhill, Ontario, Canada; Carl Griffin, Lynn Health Science Institute (LHSI), Oklahoma City, OK, USA; Yehuda Handelsman, Metabolic Institute of America, Tarzana, CA, USA; Priscilla Hollander, Baylor Endocrine Center, Dallas, TX, USA; Barry Horowitz, Metabolic Research Institute, Inc., West

## SUPPLEMENTARY DATA

Palm Beach, FL, USA; Irene Hramiak, St. Joseph's Health Care, London, Ontario, Canada; David Huffman, University Diabetes & Endocrine Consultants, Chattanooga, TN, USA; Michael Jardula, Desert Oasis Healthcare Medical Group, Palm Springs, CA, USA; Erin Keely, Ottawa Hospital, Riverside Campus, Ottawa, Ontario, Canada; Leslie Klaff, Rainier Clinical Research Center, Renton, WA, USA; David Klonoff, Mills-Peninsula Health Services, San Mateo, CA, USA; Wendy Lane, Mountain Diabetes and Endocrine Center, Asheville, NC, USA; James Larocque, Virginia Endocrinology Research, Chesapeake, VA, USA; Philip Levin, Model Clinical Research, , Baltimore, MD, USA; Carol Levy, Icahn School of Medicine at Mount Sinai, New York, NY, USA; William Litchfield, Desert Endocrinology, Henderson, NV, USA; Kathryn Lucas, Diabetes & Endocrinology Consultants, Morehead City, NC, USA; Ivy-Joan Madu, Diabetes Associates Medical Group, Orange, CA, USA; Hiralal Maheshwari, Midwest Endocrinology, Crystal Lake, IL, USA; Ronald Mayfield, Mountainview Clinical Research, Greer, SC, USA; Janet McGill, Washington University School of Medicine in St. Louis, St. Louis, MO, USA; Wendell Miers, Kentucky Diabetes Endocrinology Center, Lexington, KY, USA; Frank Mikell, Springfield Diabetes and Endocrine Center, Springfield, IL, USA; Samer Nakhle, Palm Medical Group, Las Vegas, NV, USA; Ola Odugbesan, Physicians Research Associates, LLC, Lawrenceville, GA, USA; Rakesh Patel, Endocrine and Psychiatry Center, Houston, TX, USA; Athena Philis-Tsimikas, Scripps Whittier Diabetes Institute, La Jolla, CA, USA; Antonio Pinero-Pilona, Suncoast Clinical Research, New Port Richey, FL, USA; David Podlecki, IMMUNOe International Research Centers, Longmont, CO, USA; Zubin Punthakee, McMaster University, Hamilton, Ontario, Canada; Remi Rabasa-Lhoret, Institut de Recherches Cliniques de Montréal (IRCM), Montreal, Quebec, Canada; Thomas Ransom, Nova Scotia Health Authority, Halifax, Nova Scotia, Canada; John Reed, Endocrine Research Solutions, Inc.,

## SUPPLEMENTARY DATA

Roswell, GA, USA; Michael Reeves, Private Practice, Chattanooga, TN, USA; Marc Rendell, Creighton University Medical Center, Omaha, NE, USA; Thomas Repas, Regional Health Clinical Research, Rapid City, SD, USA; Paul Rosenblit, Diabetes Lipid Management and Research Center, Huntington Beach, CA, USA; Julio Rosenstock, Dallas Diabetes and Endocrine Center, Dallas, TX, USA; Katarzyna Sadurska, Eastern Maine Medical Center, Bangor, ME, USA; Senan Sultan, East Coast Institute for Research, Fleming Island, FL, USA; David Sutton, Northeast Florida Endocrine & Diabetes Associates, Jacksonville, FL, USA; James Thrasher, Medical Investigations, Inc., Little Rock, AR, USA; Elena Toschi, Joslin Diabetes Center, Boston, MA, USA; Subbulaxmi Trikudanathan, University of Washington Medical Center, Seattle, WA, USA; Shyjauddin Valika, Associates in Endocrinology, Elgin, IL, USA; Joanna Van, Diabetes Research Center, Tustin, CA, USA; Arnold Vera, Peninsula Research Inc., Ormond Beach, FL, USA; Khurram Wadud, East Coast Institute for Research, Jacksonville, FL, USA; Michelle Welch, Diabetes and Metabolism Specialists, San Antonio, TX, USA; Vincent Woo, Diabetes Research Group, Winnipeg, Manitoba, Canada; Alan Wynne, Cotton-O'Neil Clinical Research Center, Topeka, KS, USA; Zeina Yared, LMC Diabetes and Endocrinology, Ville Saint-Laurent, Quebec, Canada

## **Inclusion and Exclusion Criteria**

### *Inclusion Criteria*

To participate in the trial, patients had to meet all of the following criteria:

- Men or nonpregnant women age  $\geq 18$  to  $\leq 75$  years of age with a diagnosis of type 1 diabetes (T1D) made at least 1 year prior to informed consent
- Treatment with insulin or insulin analog(s) delivered via continuous subcutaneous insulin infusion (CSII) or multiple daily injections (MDI) with no change in insulin delivery (CSII to MDI or vice-versa) within 3 months of screening
- A1C 7.0% to 11.0%, inclusive, at screening
- Willing and able to perform SMBG and complete the study diary as required per protocol
- For women of childbearing potential, use of an adequate method of contraception to avoid pregnancy for the duration of the study through 30 days after the last dose of study drug

### *Exclusion Criteria*

Patients meeting any of the following criteria were excluded from the study:

- Use of antidiabetic agent other than insulin at the time of screening (any medication other than insulin or insulin analog used for treatment of T1D must be washed out for at least 8 weeks prior to the screening visit)
- Any prior exposure to sotagliflozin
- Use of any sodium glucose cotransporter (SGLT) inhibitors within 8 weeks prior to screening

## SUPPLEMENTARY DATA

- Chronic systemic corticosteroid use, defined as any dose of systemic corticosteroid taken for more than 4 consecutive weeks within the 6 months prior to the screening visit.  
Topical, inhaled, ocular, or nasal sprays containing corticosteroids were allowed.
- Type 2 diabetes, or severely uncontrolled diabetes as determined by the Investigator
- History of severe hypoglycemic event within 1 month prior to the screening visit
- History of DKA within 1 month prior to screening visit, or more than 2 episodes within 6 months prior to the screening visit
- History of nonketotic hyperosmolar state within 6 months prior to the screening visit
- Estimated glomerular filtration rate  $<45$  mL/min/1.73 m<sup>2</sup> at screening, as determined by the 4 variable Modification of Diet in Renal Disease (MDRD) equation
- Fasting triglycerides  $>600$  mg/dL ( $>6.77$  mmol/L)
- Abnormal liver function at screening defined as any of the following: aspartate aminotransferase (AST)  $>2X$  upper limit of the normal reference range (ULN), ALT  $>2X$  ULN, serum total bilirubin (TB)  $>1.5X$  ULN
- Beta-hydroxy butyrate (BHB)  $>0.6$  mmol/L at screening
- Pregnant or breastfeeding or intend to be during the course of the study
- Current infectious liver disease (hepatitis A, B, or C), including antihepatitis A virus (immunoglobulin M), hepatitis B surface antigen, or antihepatitis C virus
- Difficulty swallowing such that the patient cannot take the study drug
- History of pancreatitis within 12 months of screening, or any prior history of recurrent pancreatitis
- Initiation of chronic dialysis within 30 days prior to the screening visit or expected to occur within 180 days after the screening visit

## SUPPLEMENTARY DATA

- Renal disease that required treatment with immunosuppressive therapy, or a history of dialysis or renal transplant
- History of hereditary glucose-galactose malabsorption or primary renal glucosuria
- New York Heart Association Class III or IV heart failure within 3 months prior to screening visit
- Hypertensive urgency or emergency within 30 days prior to randomization
- Patients with unstable/symptomatic or life-threatening arrhythmia or heart block
- Hospitalization due to unstable angina, myocardial infarction, or coronary artery bypass graft (CABG) or percutaneous transluminal coronary angioplasty within 3 months of screening
- Transient ischemic attack (TIA) or significant cerebrovascular disease
- History of hemoglobinopathies (sickle cell anemia, thalassemia major, sideroblastic anemia) or other disorder that may interfere with A1C determination
- Donation or loss of >400 mL of blood or blood product(s) within 8 weeks prior to screening
- Known severe immunocompromised status, including, but not limited to, patients who have undergone organ transplantation (Patients with human immunodeficiency virus (HIV) were permitted if the Investigator considered them otherwise suitable candidates)
- Malignancy or active treatment for malignancy (ie, radiation or chemotherapy, including monoclonal antibodies) within 5 years prior to the screening visit
- Current eating disorder or increase or decrease of weight within the 12 weeks prior to screening by more than 10%

## SUPPLEMENTARY DATA

- Known allergies, hypersensitivity, or intolerance to sotagliflozin or any inactive component of sotagliflozin or placebo (ie, microcrystalline cellulose, croscarmellose sodium [disintegrant], talc, silicon dioxide, and magnesium stearate [nonbovine]), unless the reaction is deemed irrelevant to the study by the Investigator
- Administration of any other investigational drug or participation in an interventional clinical research study within 30 days or 5 half-lives (whichever is longer) of planned screening visit
- History of alcohol or illicit drug abuse within 12 months prior to the screening visit
- Patient is a study coordinator, employee of an Investigator or Investigator's site, or immediate family member of any of the aforementioned
- Any condition that, in the opinion of the Investigator, may render the patient unable to complete the study
- The presence of a clinically significant medical history, physical examination, or laboratory finding that, in the opinion of the Investigator or the Sponsor, may interfere with any aspect of study conduct or interpretation of results



## SUPPLEMENTARY DATA

### **DKA and SH Procedures**

#### *Definition of Hypoglycemia*

Documented hypoglycemia (SMBG  $\leq 3.9$  mmol/L [ $\leq 70$  mg/dL] regardless of symptoms) was not considered an adverse event (AE) unless it was characterized as a serious AE.

Severe hypoglycemia was defined as an event consistent with hypoglycemia (regardless of whether biochemical documentation of a low glucose value was obtained) when the answer was yes to any of the following three questions:

- Did the patient have an episode of suspected hypoglycemia treated with any form of carbohydrate or with glucagon that required the assistance of others to treat?
- Did the patient lose consciousness during the episode?
- Did the patient have a seizure during the episode?

The phrase “patient requires the assistance of others to treat” meant that the neurologic impairment was severe enough to prevent self-treatment in the opinion of those providing assistance to treat. Assisting a patient out of kindness, when assistance is not required, was not considered as “requiring the assistance of others to treat.”

The following terms were used to identify possible severe hypoglycemia events:

|                             |                              |
|-----------------------------|------------------------------|
| Coma                        | Hypoglycemic seizure         |
| Convulsions                 | Hypoglycemic unconsciousness |
| Hypoglycemic coma           | Loss of consciousness        |
| Hypoglycemic encephalopathy | Shock hypoglycemia           |

## SUPPLEMENTARY DATA

*Note:* only those hypoglycemic cases which met criteria for severe hypoglycemia as defined in the protocol or those reported as a serious AE were submitted to the clinical endpoint committee for adjudication.

### *Definition of Diabetic Ketoacidosis*

DKA was diagnosed based on evidence of anion-gap metabolic acidosis related to excessive ketone production without a satisfactory alternative cause for anion-gap acidosis, as outlined in Kitabchi et al 2009, which was also provided to all investigators.<sup>1</sup> However, final diagnosis of metabolic acidosis, including diabetic ketoacidosis, was made by the adjudication committee. All possible DKA events were adjudicated and were classified as “Yes, with certainty”; “Yes, probably”; “No, unlikely”; “No, with certainty”; “Unclassifiable”; or “Insufficient data,” and events meeting either “Yes” criterion (with certainty or probably) were assessed as positively adjudicated.

## SUPPLEMENTARY DATA

**Diabetic Ketoacidosis Events.** The following ketosis-related adverse event terms were used to identify possible metabolic acidosis or diabetic ketoacidosis events:

| <b>Trigger terms typically associated with elevated BHB</b> | <b>Trigger terms that may not be associated with elevated BHB</b> |
|-------------------------------------------------------------|-------------------------------------------------------------------|
| Acetonemia                                                  | Acidosis                                                          |
| Blood ketone body                                           | Acidosis hyperchloremic                                           |
| Blood ketone body increased                                 | Diabetic coma                                                     |
| Blood ketone body present                                   | Diabetic hyperglycemic coma                                       |
| Diabetic ketoacidosis                                       | Diabetic metabolic decompensation                                 |
| Diabetic ketoacidotic hyperglycemic coma                    | Hyperglycemic coma                                                |
| Ketoacidosis                                                | Hyperglycemic seizure                                             |
| Ketosis                                                     | Hyperglycemic unconsciousness                                     |
| Urine ketone body                                           | Lactic acidosis                                                   |
| Urine ketone body present                                   | Metabolic acidosis                                                |
|                                                             | Renal tubular acidosis                                            |
|                                                             | Uremic acidosis                                                   |

# Patient and Provider Instructions to Mitigate Diabetic Ketoacidosis and Other Adverse Events

## Wallet Card

| Study LX4211.1-309-DM                                                                                                                                                                                                                                                                                                                                                                                                                                                                                                                                                                                                                                                                                                                                                                                                                                                                                                                                                                                                                                                                                                                                                                                                                                                                                               | Study LX4211.1-309-DM                                                                                                                                                                                                                                                                                                                                                                                                                                                                                                                                                                                                                                                                                                                                                                                                                                                                                                                                                                                                                                                                                                                                                                                                                                                                                                                                                                                                                                                                                                                                                  |
|---------------------------------------------------------------------------------------------------------------------------------------------------------------------------------------------------------------------------------------------------------------------------------------------------------------------------------------------------------------------------------------------------------------------------------------------------------------------------------------------------------------------------------------------------------------------------------------------------------------------------------------------------------------------------------------------------------------------------------------------------------------------------------------------------------------------------------------------------------------------------------------------------------------------------------------------------------------------------------------------------------------------------------------------------------------------------------------------------------------------------------------------------------------------------------------------------------------------------------------------------------------------------------------------------------------------|------------------------------------------------------------------------------------------------------------------------------------------------------------------------------------------------------------------------------------------------------------------------------------------------------------------------------------------------------------------------------------------------------------------------------------------------------------------------------------------------------------------------------------------------------------------------------------------------------------------------------------------------------------------------------------------------------------------------------------------------------------------------------------------------------------------------------------------------------------------------------------------------------------------------------------------------------------------------------------------------------------------------------------------------------------------------------------------------------------------------------------------------------------------------------------------------------------------------------------------------------------------------------------------------------------------------------------------------------------------------------------------------------------------------------------------------------------------------------------------------------------------------------------------------------------------------|
|  <p><b>Lexicon Pharmaceuticals, Inc.</b><br/> <b>PO Box: 132167</b><br/> <b>The Woodlands, Texas 77393-2167</b></p> <p><b>Study Title:</b><br/> A Phase 3, Randomized, Double-blind, Placebo-controlled, Parallel-group, Multicenter Study to Evaluate the Efficacy, Safety, and Tolerability of LX4211 as Adjunct Therapy in Adult Patients with Type 1 Diabetes Mellitus Who Have Inadequate Glycemic Control with Insulin Therapy</p> <p>If you have any concerns regarding the study or if major changes in your health condition occur, contact your study doctor.</p> <p>If you see another health care professional or are admitted to a hospital between study visits, you must tell them that you are taking part in this study, and that they can contact your study doctor for information.</p> <p>You should also inform your study doctor as soon as possible if you see another health care professional or are admitted to a hospital between study visits.</p> <p><b>24 HOUR EMERGENCY NUMBER</b><br/> <b>(the following numbers should only be used by medical staff in case of emergency only. The numbers are not to be used by patients or family members):</b></p> <p><b>[REDACTED]</b> <b>[REDACTED]</b></p> | <p><b>Please carry this card with you for the duration of the trial</b></p> <p>Mr/Ms _____ is currently participating in a blinded clinical study and has received study medication containing either the investigational study drug LX4211, or placebo beginning on _____ Site Number- _____<br/> (date of first dose)</p> <p>This phase III study is investigating the new drug LX4211 in patients with Type 1 diabetes mellitus. LX4211 is a dual SGLT-1/SGLT-2 inhibitor.</p> <p><b>Note: DKA is always preceded by ketosis. It is possible that in patients taking SGLT inhibitors, ketosis or DKA may present with non-specific / vague symptoms, and normal or low blood glucose levels, rather than high blood glucose which is traditionally associated with DKA. To correct ketosis / acidosis, it is vital to ensure that rapid acting insulin is administered frequently regardless of blood sugar levels (even if blood sugar is not elevated). Glucose containing foods or liquids should be given when this extra insulin is administered.</b></p> <p>Subject Identification Number: (Complete all blanks below for patient number)</p> <p><b>309-</b> _____ - _____</p> <p>Date Of Birth- ____ / ____ / ____<br/> Day Month Year</p> <p><b>If any problems occur please contact:</b></p> <p>_____ (Clinic, Department)</p> <p><b>Dr.</b> _____</p> <p><b>Address</b> _____</p> <p><b>Phone</b> _____</p> <p>Covance Telephone Number : _____</p> <p>Sponsor Telephone Number : _____</p> <p><small>Coe English Version 3.0 dated 30NOV2015</small></p> |

*Recommendations Letter*

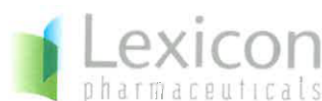

To: LX4211.1- 309 Investigators and Study Coordinators

From:

Re: Protocol LX4211.1-309-T1DM

*A Phase 3, Randomized, Double-blind, Placebo-controlled, Parallel-group, Multicenter Study to Evaluate the Efficacy, Safety, and Tolerability of LX4211 as Adjunct Therapy in Adult Patients with Type 1 Diabetes Mellitus Who Have Inadequate Glycemic Control with Insulin Therapy*

Date: 01 October 2015

Dear Investigators and Study Coordinators,

**This correspondence is being shared with you as an expert recommendation to mitigate DKA risk in T1D patients taking SGLT2 inhibitors (presentations at EASD and ADA).**

*\*Note: These recommendations also apply for patients enrolled in all sotagliflozin (LX4211) trials*

- Never forget that DKA CAN occur with low, normal or high blood sugars in T1D patients taking SGLT inhibitors
- Any T1D patient using an SGLT inhibitor MUST be adherent to ketone testing
  - Urine Ketones can be used as screen
  - Blood Ketones (BHB) should be used to
    - Establish degree of ketosis -- is it above 0.6 mmol/L?
    - Inform decision-maker: is ketosis improving or worsening?
- Test ketones for general malaise, abdominal pain, not eating, more physically active, or drinking ETOH, REGARDLESS of BG level
- If ketones positive (blood ketones  $\geq$  0.6 mmol/L or urine ketones moderate or higher)
  - Hold the SGLT inhibitor
  - Do not hold insulin, consider increasing basal insulin
  - Consume 15-30 grams of carbs each hour (glucose containing sports drink/oral rehydration fluid)
  - Give bolus insulin (by pen/syringe) for the carbs EVEN if BG normal
  - Make sure patient has antiemetic

**Instructions provided for DKA Recognition and Management in the sotagliflozin protocols:**

**Instructions for the patient and site staff:**

It is possible that GI or other AEs occurring with LX4211 may mask presenting symptoms of DKA (Appendix H). Therefore, it is important that patients with GI complaints or intercurrent illness be instructed by the site to measure their blood or urine ketone or blood BHB levels.

## SUPPLEMENTARY DATA

These symptoms include but are not limited to: inability to maintain oral intake, generalized weakness, excessive thirst, abdominal pain, nausea, vomiting, rapid weight loss, fever, frequent urination, fruity-scented breath, confusion, acute illness and or consistently elevated blood glucose.

If a patient is scheduled for a procedure or surgery that requires withholding oral intake (NPO), it is recommended that study drug is held from the day prior to procedure or surgery and resumed the day after procedure or surgery is complete and patient is tolerating adequate oral intake.

At every clinic visit blood BHB (central laboratory and point-of-care) testing will be conducted. At visits where UA is performed, the evaluation will include urine ketone determination by dipstick. If the urine ketones are positive or blood BHB level is  $>0.6$  mmol/L, the patients will be asked to contact the Investigative site immediately. In this situation, the patient should take additional rapid acting insulin by syringe (not insulin pump) according to the correction dose algorithm provided by the Investigator. Typically the additional rapid acting insulin dose is given every 2 hours until normalization of glucose and urine ketone (or glucose and blood BHB level). The site will evaluate if an assessment for metabolic acidosis is appropriate. If laboratory testing confirms presence of metabolic acidosis, then the "Possible DKA" eCRF will be completed.

If nausea and vomiting are present and the patient is unable to keep liquids down, the patient should be evaluated in an Emergency Room.

### **Ketone testing in sotagliflozin protocols:**

- BHB POC and central lab is tested at every clinic visit
- BHB meter, testing strips, and Ketostix for home use are provided to all patients at the Screening visit
- Whenever a patient has symptoms suspicious for DKA (as noted in paragraph 1 above), they must use ketostix to check for urine ketones as a screen. If urine ketones are positive, then use BHB meter to determine if BHB  $> 0.6$  mmol/L. If BHB  $> 0.6$  mmol/L, patients must call the site for further instructions

***Aligned with testing of BHB in all sotagliflozin T1D studies, any BHB result  $> 0.6$  mmol/L is being closely monitored. If a patient randomized in a sotagliflozin study at your site meets the threshold of BHB  $> 0.6$  mmol/L, you will receive a query from the Covance Medical Monitor asking for confirmation of patient's clinical status, based on which further testing may be necessary (including repeating central and POC BHB test to follow resolution of ketosis). Please respond to these queries within 2 business days. If you have any question related to BHB testing or interpretation, please do not hesitate to contact the Covance Medical Monitor.***

Sincerely,

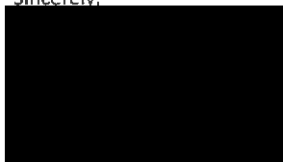

Lexicon Pharmaceuticals, Inc.

## SUPPLEMENTARY DATA

### *Protocol Instructions for the Patient and Site Staff*

At every clinic visit blood BHB (central laboratory and point-of-care) testing will be conducted.

At visits where UA is performed, the evaluation will include urine ketone determination by dipstick.

It is possible that GI or other AEs occurring with sotagliflozin may mask presenting symptoms of diabetic ketoacidosis. These symptoms include but are not limited to: inability to maintain oral intake, generalized weakness, excessive thirst, abdominal pain, nausea, vomiting, rapid weight loss, fever, frequent urination, fruity-scented breath, confusion, acute illness and/or consistently elevated blood glucose. Therefore, it is important that patients with GI complaints or intercurrent illness be instructed by the site to measure their blood or urine ketone or blood BHB levels.

(Note: In some patients alcohol may be a possible trigger for ketosis).

If ketosis is present (moderate or higher for urine ketones or blood BHB level is  $>0.6$  mmol/L), then the patient will be asked to contact the Investigative site immediately. In this situation, the investigator should consider instructing the patient to take rapid acting insulin by syringe (not insulin pump) as well as eat carbohydrates in order to reverse the ketosis. After rechecking the ketones, the investigator should consider instructing the patient to take additional doses of rapid acting insulin every 2 hours until elevated ketones are normalized. Because the amount of insulin needed to lower ketones will also lower blood glucose, it is necessary for the patient to increase carbohydrate intake. Typically this would be 15-30 grams of carbohydrate each hour provided by a glucose containing sports drink or oral rehydration fluid. The site will evaluate if an assessment for metabolic acidosis is appropriate. If laboratory testing confirms presence of metabolic

## SUPPLEMENTARY DATA

acidosis, then the “Possible diabetic ketoacidosis” eCRF will be completed. If nausea and vomiting are present and the patient is unable to keep liquids down the patient should be evaluated in an Emergency Room.

If a patient is scheduled for a procedure or surgery that requires withholding oral intake (NPO), it is recommended that study drug is held from the day prior to procedure or surgery and resumed the day after procedure or surgery is complete and patient is tolerating adequate oral intake.

An independent adjudication committee composed of experts in T1D will adjudicate cases of diabetic ketoacidosis (including all cases of metabolic acidosis) in a blinded fashion.

### *Patient Communication Card Text*

The following list may help you to recognize Diabetic Ketoacidosis (DKA).

- Inability to maintain oral intake
- Generalized weakness
- Abdominal (belly) pain
- Increased weight loss
- Fever
- Frequent urination, including at night
- Fruity-scented breath
- Confusion
- Acute illness



## SUPPLEMENTARY DATA

- Consistently elevated blood glucose
- Feeling very thirsty or drinking a lot
- Nausea or vomiting
- Having trouble thinking clearly or feeling tired

It is possible to have DKA even if your blood glucose is not elevated. Regardless of your blood glucose level, if you have any of these symptoms on the list, then measure your blood or urine ketone or blood BHB level. If the urine ketones are high (your study doctor may instruct you that this is a level of “moderate” or more than “moderate”) or blood BHB level is above 0.6 mmol/L, then contact your study site immediately for assistance with managing your diabetes.”

In some patients alcohol use may lead to production of ketones by your body.

If you are scheduled for a procedure or surgery that requires you to not take any food or liquids, please contact your study doctor for instructions on continuing study drug. In such cases your study doctor may advise you NOT to take your study drug from the day prior to the procedure or surgery until after the procedure or surgery is complete, and you are taking food and liquids as you normally do.

### Statistical Approaches

#### *Efficacy Analyses*

The primary dataset used to conduct the efficacy analyses was modified intent-to-treat (mITT) population, which included all randomized patients who had taken at least 1 dose of study drug.

The sample size was based on satisfying design assumptions for the primary efficacy endpoint. Assuming a true treatment difference of -0.4% and a common standard deviation of 1.0%, 157 patients per treatment group provided 90% power to determine if either sotagliflozin 200 mg or sotagliflozin 400 mg differed from placebo in the mean A1C change from Baseline to Week 24 at an overall 0.05  $\alpha$ -level (2-sided). This calculation was based on a 2.5% significance level ( $\alpha=0.025$ ) assigned to each LX4211 comparison to placebo. This  $\alpha$ -level corresponded to the per comparison error rate used in applying a Bonferroni test to the primary endpoint and provided strong control of the local family-wise error rate (FWER) at 0.05. The Bonferroni procedure was part of a tree gatekeeping method used to maintain strong control of the study-wise type I error rate in testing hypotheses among the primary and secondary efficacy endpoints. The sample size estimate was further adjusted to account for dropouts in a manner that reflected the primary analysis was conducted in the modified Intent-to-treat (mITT) patients. It was assumed that the dropped sotagliflozin patients would respond as the placebo patients and that there was no dropout in patients in the placebo group. These assumptions netted an adjusted effect size for detection of  $-0.4\% \times (1-0.20) = -0.320\%$ , where the dropout rate over 24 weeks was assumed uniformly to be 20%. Based on this adjusted effect size, 244 patients were required per treatment group, for a total of 732 patients across the 3 treatment groups. These estimates were rounded upward for a requirement of 250 patients per treatment group or 750 total patients.

## SUPPLEMENTARY DATA

The 24-week core treatment period data was used to satisfy analysis requirements for the primary and secondary efficacy endpoints. Use of the long-term extension period data was to be used in a supplemental manner for efficacy comparisons and to provide long term data on safety. The primary analysis of the primary efficacy endpoint used mixed-effects model for repeated measures (MMRM) statistics based on the restricted maximum likelihood (REML) method for estimation. The analysis model included fixed, categorical effects of treatment, insulin delivery (MDI, CSII), week -2 A1C ( $\leq 8.5\%$ ,  $> 8.5\%$ ), time (study week), baseline A1C-by-time interaction, and a treatment-by-time interaction. An unstructured (co)variance structure was used to model the within-patient errors. Other structures may have been explored by use of Akaike's information criteria if the unstructured (co)variance structure did not result in model convergence. The Kenward-Roger approximation was used to estimate the denominator degrees of freedom. The adjusted mean change in A1C from baseline to week 24 for each treatment group were estimated in the framework of this model (ie, least squares mean), as well as the between-group differences (comparing LX4211 to placebo) and the 95% confidence intervals for the adjusted mean. All post-baseline observations collected at scheduled visits were used in the MMRM, including data collected after the discontinuation of study drug.

A key assumption for drawing valid conclusions using the MMRM analysis was that the reason for missing data was expected to be a function of the missing at random (MAR) mechanism. This appeared to be a reasonable assumption for this particular dataset. Since one cannot be fully certain that other mechanisms can underlie the reason for missing data (eg, missing not at random; MNAR), it was important to perform sensitivity analyses of the MMRM results. Under

## SUPPLEMENTARY DATA

an assumption of MNAR, several statistical models were proposed to analyze the data: 2 of the more commonly employed methods being the Pattern Mixture Model (PMM) and the selection model. Of these candidate models, the PMM method with control-based pattern imputation was used in the sensitivity analysis for this study. Methods were adopted to estimate for both non-monotone and monotone missing data patterns. Imputations for the non-monotone missing data pattern were the initial step, used an imputation algorithm based on Monte Carlo Markov Chain methodology, and assumed a MAR mechanism for the missing data. Multiple imputations were performed to assign the response variable at consecutive study weeks in a sequential manner for the monotone missing data pattern. For this chain-based method, control-based imputation was applied so that there was no direct use of observed data from the LX4211 treatment groups in estimating the imputation model. The method was derived such that it built its imputation only on the placebo group data. The resulting imputed datasets were analyzed by an analysis of covariance (ANCOVA) model fitted for the fixed, categorical effects of treatment, insulin delivery method (MDI, CSII), Week -2 A1C ( $\leq 8.5\%$ ,  $>8.5\%$ ), and the continuous, fixed covariate of baseline A1C. Summary statistics from applying the ANCOVA model across the multiple imputed datasets were combined to yield an overall estimate of the treatment group differences. The PMM analysis was applied to primary and secondary efficacy endpoints.

Continuous secondary and other endpoints were summarized using standard descriptive statistics, and in many instances, the treatment effects were evaluated using MMRM statistics as specified for the primary efficacy analysis with the replacement of the baseline A1C- by-time interaction specific to the dependent variable under test. An ANCOVA analysis was applied

## SUPPLEMENTARY DATA

where only 1 post-baseline scheduled visit occurred. All post-baseline data at scheduled visits were used in these analyses, including observations occurring after discontinuation of study drug.

For binary endpoints, the frequency and percent of outcome were presented by treatment group. The primary analysis of these endpoints used a Cochran-Mantel-Haenszel (CMH) test stratified by the different levels of the randomization stratification factors of insulin delivery method (MDI, CSII) and week -2 A1C ( $\leq 8.5\%$ ,  $> 8.5\%$ ). The treatment group comparisons were performed separately at week 24 only, with descriptive statistics provided for each clinic visit. Missing observations at week 24 were imputed as nonresponse.

Multiplicity in statistical testing of the efficacy variables at week 24 occurred from 2 main sources: (a) testing of the primary endpoint and multiple secondary endpoints, and (b) testing of two sotagliflozin dose groups against placebo for each endpoint. These considerations yielded 14 hypotheses to be tested that were grouped into seven families. Each family corresponded to the specific endpoint under test. Family F1 consisted of the sotagliflozin 200 mg versus placebo and sotagliflozin 400 mg versus placebo comparisons for the primary endpoint. Family F2 included the same treatment group comparisons for the first listed secondary endpoint; F3 included the same comparisons for the second listed secondary endpoint, and so on. The seven families were to be tested sequentially with the restriction that the test of each treatment group comparison required all prior tests of that particular comparison to meet statistical significance criteria. The primary endpoint hypotheses were to be tested by a Bonferroni procedure with  $\alpha = 0.05$  (2-sided) and use of equal weights so that the per comparison error rate = 0.025 (2-sided). The raw  $P$  value for each treatment contrast was to be compared with  $\alpha = 0.025$  and if the raw  $P$  value was less

## SUPPLEMENTARY DATA

than or equal to 0.025, the comparison was to be declared statistically significant and testing for that contrast could proceed to the next listed endpoint. Consistent with testing the primary endpoint, the family-wise error rate (FWER) within each secondary endpoint family was 0.05 (2-sided), and with hypothesis weights of 0.5 assigned to each contrast within each testable family, the per comparison  $\alpha$ -level = 0.025 (2-sided). Assessment of the testable hypotheses for the secondary endpoints was to be made in the same manner that was applied to the primary endpoint. Formal testing of a particular treatment comparison was to stop at that endpoint for which a raw  $P$  value exceeded 0.025. Progression in testing across the hypothesis families was to be carried out, in essence, using a tree gatekeeping test procedure so that the study-wise error rate across all primary and secondary hypotheses tested was to be strongly controlled at  $\alpha = 0.05$ . This procedure was not applied to the week 52 comparisons.

### *Subgroup Analyses*

Subgroup analyses of the primary efficacy variable were to be performed for different categories of Baseline characteristics and the randomization stratification factors. Analysis of treatment effects for each subgroup was to use a MMRM model that included fixed, categorical effects of treatment, insulin delivery (MDI, CSII; excluded if it was a subgroup variable), week -2 A1C ( $\leq 8.5\%$ ,  $> 8.5\%$ ; excluded if it was a subgroup variable), time (study week), baseline A1C-by-time interaction, and a treatment-by-time interaction.

In addition, change from baseline in SBP (mm Hg) at week 12 was to be summarized and analyzed using MMRM model fitted for the fixed, categorical effects of treatment, insulin delivery (MDI, CSII), Week -2 A1C ( $\leq 8.5\%$ ,  $> 8.5\%$ ), time (study week), baseline SBP-by-time interaction, and a treatment-by-time interaction for the following subgroups:

## SUPPLEMENTARY DATA

- Baseline SBP <130 mm Hg
- Baseline SBP  $\geq$ 130 mm Hg

All subgroup analyses were to be exploratory.

### *Safety Analyses*

Safety analysis primarily involved examination of descriptive statistics and individual patient listings for any effects of study treatment on clinical tolerability and safety. Summaries were prepared by treatment group and, as needed, by clinic visit. These summaries were based on the safety population and other subpopulations as needed. All safety data (adverse events [AEs], events of special interest, laboratory test results, vital signs, electrocardiogram (ECG) results, and physical examinations) were provided in listings.

Vital signs, physical examination findings, laboratory results, and ECGs were summarized descriptively at each study visit. Actual and change from baseline data were calculated and summarized. In addition, shift table analyses were presented for the laboratory data.

Because of the importance of hypoglycemia in this patient population, various measures of this variable were analyzed. Change from baseline in hypoglycemic events calculated as a daily average over the week prior to the visit was to be analyzed as a continuous variable as described previously. Since events data also served as a measure of safety, additional analyses were conducted. The first analysis of hypoglycemic events was conducted using CMH tests stratified by the randomization factors at each study visit. These tests provided inferential and descriptive summaries of the relative risk estimate for each of the four hypoglycemic event definitions:  $\leq 3.8$

## SUPPLEMENTARY DATA

mmol/L ( $\leq 70$  mg/dL) by SMBG,  $< 3.9$  mmol/L ( $< 70$  mg/dL) by CGM,  $\leq 3.0$  mmol/L ( $\leq 55$  mg/dL) by SMBG, and  $< 3.0$  mmol/L ( $< 55$  mg/dL) by CGM. The patient incidence of these hypoglycemic events was counted over the week prior to the scheduled study visit used in the analysis. The second analysis of these data examined the relative risk for each of the hypoglycemic event definitions over the entire core treatment period by use of a generalized linear model (GLM). The GLM included fixed, categorical effects of treatment, randomization strata of insulin delivery method (MDI, CSII), randomization strata of Week -2 A1C ( $\leq 8.5\%$ ,  $> 8.5\%$ ), and an offset term for the log of the treatment duration during the core treatment period (first 24 weeks). The event rates were modeled as a negative binomial process. Similarly, event rates during the overall treatment period were to be modeled using the GLM model, with log of the total treatment duration as the offset term.

### *Adverse Events*

All AEs were coded and listed by body system and preferred term based on Medical Dictionary for Regulatory Activities (MedDRA). Summaries using descriptive statistics were provided for treatment-emergent AEs, drug-related AEs, and AEs by intensity. Treatment-emergent AEs (TEAEs) were those events not present at baseline, but occurring after the start of study treatment, or if existing at baseline, increasing in intensity after the initiation of study drug. When multiple occurrences of the same event were reported for the same patient, summaries made by intensity selected the event with the highest intensity. In a similar manner, summaries prepared by drug relationship selected the event with the greatest degree of relationship when a patient reports multiple occurrences of the same event. Summaries of TEAEs were presented for the 24-week core treatment period, the 28-week long term extension period, and the overall



## SUPPLEMENTARY DATA

treatment period by treatment group for the safety population. TEAE displays were to include the overall incidence (by system organ class and preferred term), events by maximum intensity, events by relationship to study drug, events leading to discontinuation of study drug, events of special interest, and serious adverse events.

On-study deaths were reported for deaths occurring during the active phase of the treatment period and 30 days after stopping study drug. Also, deaths occurring outside the 30-day window, but secondary to an AE reported within the 30-day post-treatment period, were reported. Listings were provided for deaths, SAEs, and discontinuations due to AEs.

## SUPPLEMENTARY DATA

### Volume Depletion Events

The following terms were used to identify possible volume depletion events.

|                                               |                                   |
|-----------------------------------------------|-----------------------------------|
| Acute prerenal failure                        | Cardiac index abnormal            |
| Blood pressure abnormal                       | Cardiac index decreased           |
| Blood pressure ambulatory abnormal            | Cardiac output decreased          |
| Blood pressure ambulatory decreased           | Cardiogenic shock                 |
| Blood pressure decreased                      | Cardiovascular insufficient       |
| Blood pressure diastolic abnormal             | Carotid pulse abnormal            |
| Blood pressure diastolic decreased            | Carotid pulse decreased           |
| Blood pressure fluctuation                    | Central venous pressure abnormal  |
| Blood pressure immeasurable                   | Central venous pressure decreased |
| Blood pressure inadequately controlled        | Circulatory collapse              |
| Blood pressure orthostasis abnormal           | Decreased ventricular preload     |
| Blood pressure orthostatic decreased          | Dehydration                       |
| Blood pressure systolic abnormal              | Diastolic hypotension             |
| Blood pressure systolic decreased             | Distributive shock                |
| Blood pressure systolic inspiratory decreased | Femoral pulse abnormal            |
| Brachial pulse abnormal                       | Femoral pulse decreased           |
| Brachial pulse decreased                      | Hemodynamic test abnormal         |
| Brachial pulse increase                       | Heart rate abnormal               |
| BUN/creatinine ratio increased                | Heart rate decreased              |
| Capillary nail refill test abnormal           | Heart rate increased              |
|                                               | Heart rate irregular              |

## SUPPLEMENTARY DATA

|                                                   |                                          |
|---------------------------------------------------|------------------------------------------|
| Hypoperfusion                                     | Pulse pressure abnormal                  |
| Hypotension                                       | Pulse pressure decreased                 |
| Hypovolemia                                       | Pulse volume decreased                   |
| Hypovolemic shock                                 | Pulse waveform abnormal                  |
| Labile blood pressure                             | Radial pulse abnormal                    |
| Left ventricular end-diastolic pressure decreased | Radial pulse decreased                   |
| Maximum heart rate decreased                      | Renal ischemia                           |
| Mean arterial pressure decreased                  | Schelling test                           |
| Orthostatic heart rate response increased         | Shock                                    |
| Orthostatic hypotension                           | Stress polycythemia                      |
| Orthostatic intolerance                           | Syncope                                  |
| Pedal pulse abnormal                              | Thirst                                   |
| Pedal pulse decreased                             | Tilt table test positive                 |
| Peripheral circulatory failure                    | Urine albumin/creatinine ratio increased |
| Peripheral coldness                               | Urine flow decreased                     |
| Peripheral pulse decreased                        | Urine output decreased                   |
| Popliteal pulse abnormal                          | Urine protein/creatinine ratio increased |
| Popliteal pulse decreased                         | Vascular test abnormal                   |
| Prerenal failure                                  | Venous pressure abnormal                 |
| Presyncope                                        | Venous pressure decreased                |
| Pulse abnormal                                    | Venous pressure jugular abnormal         |
| Pulse absent                                      | Venous pressure jugular decreased        |
|                                                   | Volume blood decreased                   |

## SUPPLEMENTARY DATA

### Renal Events

The following terms were used to identify possible renal events.

|                                                |                                      |
|------------------------------------------------|--------------------------------------|
| Acute prerenal failure                         | Creatinine urine decreased           |
| Anuria                                         | Creatinine urine increased           |
| Azotemia                                       | Cystatin C abnormal                  |
| Blood creatine abnormal                        | Cystatin C increased                 |
| Blood creatine decreased                       | Diabetic end stage renal disease     |
| Blood creatine increased                       | Glomerular filtration rate abnormal  |
| Blood creatinine abnormal                      | Glomerular filtration rate decreased |
| Blood creatinine decreased                     | Glomerular filtration rate increased |
| Blood creatinine increased                     | Hypercreatinemia                     |
| Blood urea abnormal                            | Hyperparathyroidism secondary        |
| Blood urea increased                           | Inulin renal clearance abnormal      |
| Blood urea nitrogen/creatinine ratio increased | Inulin renal clearance decreased     |
| Coma uremic                                    | Kidney fibrosis                      |
| Computerized tomogram kidney abnormal          | Nephrogenic anemia                   |
| Creatine urine abnormal                        | Nitrogen balance negative            |
| Creatine urine decreased                       | Edema due to renal disease           |
| Creatine urine increased                       | Oliguria                             |
| Creatinine renal clearance abnormal            | Pericarditis uremic                  |
| Creatinine renal clearance decreased           | Phenolsulfonphthalein test abnormal  |
| Creatinine urine abnormal                      | Postoperative renal failure          |
|                                                | Prerenal failure                     |

## SUPPLEMENTARY DATA

|                              |                                          |
|------------------------------|------------------------------------------|
| Renal cortical necrosis      | Urea renal clearance decreased           |
| Renal disorder               | Urea renal clearance increased           |
| Renal failure                | Uridosis                                 |
| Renal failure acute          | Urine albumin/creatinine ratio abnormal  |
| Renal failure chronic        | Urine albumin/creatinine ratio decreased |
| Renal function test abnormal | Urine albumin/creatinine ratio increased |
| Renal impairment             | Urine output                             |
| Renal injury                 | Urine output decreased                   |
| Renal necrosis               | Urine output increased                   |
| Renal papillary necrosis     | Urine protein/creatinine ration abnormal |
| Renal scan abnormal          | Urine protein/creatinine ratio decreased |
| Renal tubular acidosis       | Urine protein/creatinine ratio increased |
| Renal tubular atrophy        |                                          |
| Renal tubular disorder       |                                          |
| Renal tubular necrosis       |                                          |
| Ultrasound kidney abnormal   |                                          |
| Uremia odor                  |                                          |
| Uremic acidosis              |                                          |
| Uremic encephalopathy        |                                          |
| Uremic gastropathy           |                                          |
| Uremic neuropathy            |                                          |
| Uremic pruritus              |                                          |
| Urea renal clearance         |                                          |

Figure 1. Patient disposition

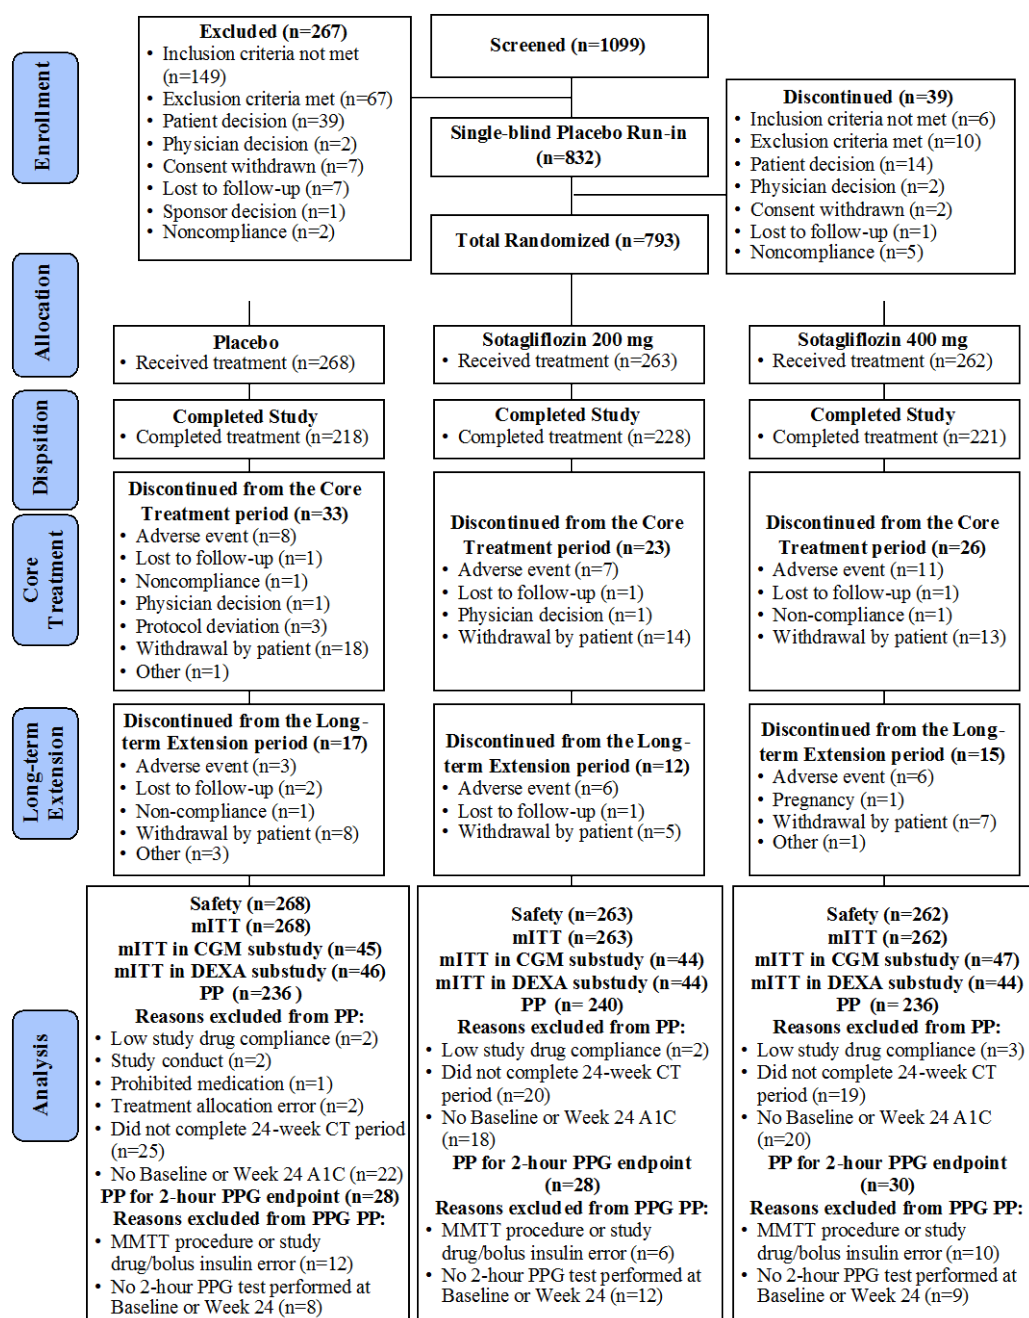

# SUPPLEMENTARY DATA

Table 1. Baseline characteristics

| <b>Characteristic</b>                           | <b>Placebo<br/>(n=268)</b>         | <b>Sotagliflozin<br/>200 mg<br/>(n=263)</b> | <b>Sotagliflozin<br/>400 mg<br/>(n=262)</b> | <b>Total<br/>(N=793)</b>           |
|-------------------------------------------------|------------------------------------|---------------------------------------------|---------------------------------------------|------------------------------------|
| Age (years)                                     | 45.2 (12.72)                       | 46.6 (13.48)                                | 46.4 (13.12)                                | 46.1 (13.11)                       |
| Female sex, n (%)                               | 131 (48.9)                         | 137 (52.1)                                  | 142 (54.2)                                  | 410 (51.7)                         |
| Race or ethnic group, n (%)*                    |                                    |                                             |                                             |                                    |
| White                                           | 244 (91.0)                         | 241 (91.6)                                  | 246 (93.9)                                  | 731 (92.2)                         |
| Black                                           | 9 (3.4)                            | 11 (4.2)                                    | 8 (3.1)                                     | 28 (3.5)                           |
| Asian                                           | 4 (1.5)                            | 4 (1.5)                                     | 2 (0.8)                                     | 10 (1.3)                           |
| Native American                                 | 0                                  | 1 (0.4)                                     | 0                                           | 1 (0.1)                            |
| Native Hawaiian or other<br>Pacific Islander    | 2 (0.7)                            | 2 (0.8)                                     | 0                                           | 4 (0.5)                            |
| Other                                           | 9 (3.4)                            | 4 (1.5)                                     | 6 (2.3)                                     | 19 (2.4)                           |
| Hispanic/Latino ethnicity                       | 7 (2.6)                            | 8 (3.0)                                     | 15 (5.7)                                    | 30 (3.8)                           |
| Diabetes duration, years                        | 24.2 (12.38)                       | 25.0 (13.15)                                | 24.0 (12.88)                                | 24.4 (12.80)                       |
| A1C (%)                                         | 7.54 (0.712)                       | 7.61 (0.735)                                | 7.56 (0.724)                                | 7.57 (0.723)                       |
| A1C (mmol/mol)                                  | 58.9 (7.80)                        | 59.7 (7.98)                                 | 59.1 (7.91)                                 | 59.2 (7.90)                        |
| A1C <7.0% at baseline, n (%)                    | 51 (19.03)                         | 50 (19.01)                                  | 51 (19.47)                                  | 152 (19.17)                        |
| Fasting plasma glucose (mmol/L)<br>(mg/dL ± SD) | 8.53 (3.582)<br>(153.7 ±<br>64.53) | 8.61 (3.814)<br>(155.1 ±<br>68.71)          | 8.23 (3.492)<br>(148.2 ±<br>62.95)          | 8.45 (3.631)<br>(152.3 ±<br>65.42) |
| Weight (kg)                                     | 87.30 (17.709)                     | 86.96 (18.539)                              | 86.50 (18.004)                              | 86.92 (18.065)                     |

SUPPLEMENTARY DATA

| <b>Characteristic</b>                            | <b>Placebo<br/>(n=268)</b> | <b>Sotagliflozin<br/>200 mg<br/>(n=263)</b> | <b>Sotagliflozin<br/>400 mg<br/>(n=262)</b> | <b>Total<br/>(N=793)</b>   |
|--------------------------------------------------|----------------------------|---------------------------------------------|---------------------------------------------|----------------------------|
| Body mass index (kg/m <sup>2</sup> )             | 29.55 (5.188)              | 29.81 (5.686)                               | 29.63 (5.297)                               | 29.66 (5.387)              |
| Body mass index ≥30 kg/m <sup>2</sup> , n<br>(%) | 114 (42.5)                 | 121 (46.0)                                  | 114 (43.5)                                  | 349 (44.0)                 |
| Blood pressure (mm Hg)                           | 120.9/76.4<br>(13.47/8.24) | 120.0/76.4<br>(14.84/9.28)                  | 119.5/75.3<br>(14.73/9.17)                  | 120.1/76.1<br>(14.35/8.91) |
| Systolic blood pressure ≥130 mm<br>Hg, n (%)     | 64 (23.9)                  | 60 (22.8)                                   | 60 (22.9)                                   | 184 (23.2)                 |
| Total daily insulin dose (IU/kg)                 | 0.74 (0.357)               | 0.72 (0.386)                                | 0.72 (0.335)                                | 0.73 (0.360)               |
| Insulin dose (IU/day)                            |                            |                                             |                                             |                            |
| Total                                            | 66.79 (41.265)             | 65.11 (42.698)                              | 64.15 (37.636)                              | 65.36 (40.561)             |
| Basal                                            | 35.06 (19.733)             | 34.84 (23.903)                              | 33.39 (18.956)                              | 34.44 (20.958)             |
| Bolus and corrections                            | 31.72 (25.077)             | 30.27 (23.646)                              | 30.75 (22.832)                              | 30.92 (23.856)             |
| Insulin therapy, n (%)                           |                            |                                             |                                             |                            |
| MDI                                              | 108 (40.3)                 | 107 (40.7)                                  | 105 (40.1)                                  | 320 (40.4)                 |
| CSII                                             | 160 (59.7)                 | 156 (59.3)                                  | 157 (59.9)                                  | 473 (59.6)                 |

Data are mean (SD) unless otherwise indicated.

\*Determined according to patient self-report.



# SUPPLEMENTARY DATA

Table 2. Primary, Secondary, and Other Prespecified Endpoints.

|                                           | 24 Weeks          |                         |                         | 52 Weeks          |                         |                         |
|-------------------------------------------|-------------------|-------------------------|-------------------------|-------------------|-------------------------|-------------------------|
| Characteristic                            | Placebo           | Sotagliflozin<br>200 mg | Sotagliflozin<br>400 mg | Placebo           | Sotagliflozin<br>200 mg | Sotagliflozin<br>400 mg |
| A1C (%)*                                  |                   |                         |                         |                   |                         |                         |
| No. patients                              | 246               | 245                     | 242                     | 219               | 233                     | 224                     |
| Baseline, mean $\pm$ SD                   | 7.54 $\pm$ 0.712  | 7.61 $\pm$ 0.735        | 7.56 $\pm$ 0.724        | 7.54 $\pm$ 0.712  | 7.61 $\pm$ 0.735        | 7.56 $\pm$ 0.724        |
| Difference from baseline,<br>LSM $\pm$ SE | -0.07 $\pm$ 0.036 | -0.43 $\pm$ 0.036       | -0.48 $\pm$ 0.036       | -0.01 $\pm$ 0.044 | -0.26 $\pm$ 0.044       | -0.32 $\pm$ 0.044       |
| 95% CI                                    | -0.14 to -0.00    | -0.50 to -0.36          | -0.56 to -0.41          | -0.10 to 0.07     | -0.35 to -0.18          | -0.41 to -0.24          |
| <i>P</i> value                            | 0.038             | <0.001                  | <0.001                  | 0.80              | <0.001                  | <0.001                  |
| Difference from placebo,<br>LSM $\pm$ SE  |                   | -0.36 $\pm$ 0.047       | -0.41 $\pm$ 0.047       |                   | -0.25 $\pm$ 0.059       | -0.31 $\pm$ 0.059       |
| 95% CI                                    |                   | -0.45 to -0.27          | -0.50 to -0.32          |                   | -0.37 to -0.14          | -0.43 to -0.20          |
| <i>P</i> value                            |                   | <0.001                  | <0.001                  |                   | <0.001                  | <0.001                  |
| A1C (mmol/mol)                            |                   |                         |                         |                   |                         |                         |
| No. patients                              | 246               | 245                     | 242                     | 219               | 233                     | 224                     |
| Baseline, mean $\pm$ SD                   | 58.9 $\pm$ 7.80   | 59.7 $\pm$ 7.98         | 59.1 $\pm$ 7.91         | 58.9 $\pm$ 7.80   | 59.7 $\pm$ 7.98         | 59.1 $\pm$ 7.91         |
| Difference from baseline,                 | -0.8 $\pm$ 0.39   | -4.7 $\pm$ 0.40         | -5.3 $\pm$ 0.39         | -0.1 $\pm$ 0.48   | -2.8 $\pm$ 0.48         | -3.5 $\pm$ 0.48         |

## SUPPLEMENTARY DATA

|                                           | 24 Weeks         |                         |                         | 52 Weeks         |                         |                         |
|-------------------------------------------|------------------|-------------------------|-------------------------|------------------|-------------------------|-------------------------|
| Characteristic                            | Placebo          | Sotagliflozin<br>200 mg | Sotagliflozin<br>400 mg | Placebo          | Sotagliflozin<br>200 mg | Sotagliflozin<br>400 mg |
| LSM $\pm$ SE                              |                  |                         |                         |                  |                         |                         |
| 95% CI                                    | -1.5 to -0.0     | -5.5 to -3.9            | -6.1 to -4.5            | -1.0 to 0.8      | -3.8 to -1.9            | -4.5 to -2.6            |
| <i>P</i> value                            | 0.046            | <0.001                  | <0.001                  | 0.82             | <0.001                  | <0.001                  |
| Difference from placebo,<br>LSM $\pm$ SE  |                  | -3.9 $\pm$ 0.51         | -4.5 $\pm$ 0.51         |                  | -2.7 $\pm$ 0.64         | -3.4 $\pm$ 0.64         |
| 95% CI                                    |                  | -4.9 to -2.9            | -5.5 to -3.5            |                  | -4.0 to -1.5            | -4.7 to -2.2            |
| <i>P</i> value                            |                  | <0.001                  | <0.001                  |                  | <0.001                  | <0.001                  |
| FPG (mmol/L) <sup>†</sup>                 |                  |                         |                         |                  |                         |                         |
| No. patients                              | 245              | 245                     | 242                     | 219              | 231                     | 224                     |
| Baseline, mean $\pm$ SD                   | 8.53 $\pm$ 3.582 | 8.61 $\pm$ 3.814        | 8.23 $\pm$ 3.492        | 8.53 $\pm$ 3.582 | 8.61 $\pm$ 3.814        | 8.23 $\pm$ 3.492        |
| Difference from baseline,<br>LSM $\pm$ SE | 0.21 $\pm$ 0.191 | -0.34 $\pm$ 0.192       | -0.78 $\pm$ 0.193       | 0.50 $\pm$ 0.227 | -0.18 $\pm$ 0.222       | -0.58 $\pm$ 0.225       |
| 95% CI                                    | -0.17 to 0.59    | -0.72 to 0.04           | -1.16 to -0.40          | 0.05 to 0.94     | -0.62 to 0.26           | -1.02 to -0.13          |
| <i>P</i> value                            | 0.27             | 0.08                    | <0.001                  | 0.028            | 0.42                    | 0.011                   |
| Difference from placebo,<br>LSM $\pm$ SE  |                  | -0.55 $\pm$ 0.259       | -0.99 $\pm$ 0.260       |                  | -0.68 $\pm$ 0.308       | -1.08 $\pm$ 0.311       |
| 95% CI                                    |                  | -1.06 to -0.04          | -1.50 to -0.48          |                  | -1.28 to -0.08          | -1.69 to -0.47          |
| <i>P</i> value                            |                  | 0.034                   | <0.001                  |                  | 0.028                   | <0.001                  |

SUPPLEMENTARY DATA

|                                       | 24 Weeks          |                         |                         | 52 Weeks          |                         |                         |
|---------------------------------------|-------------------|-------------------------|-------------------------|-------------------|-------------------------|-------------------------|
| Characteristic                        | Placebo           | Sotagliflozin<br>200 mg | Sotagliflozin<br>400 mg | Placebo           | Sotagliflozin<br>200 mg | Sotagliflozin<br>400 mg |
| FPG (mg/dL) <sup>†</sup>              |                   |                         |                         |                   |                         |                         |
| No. patients                          | 245               | 245                     | 242                     | 219               | 231                     | 224                     |
| Baseline, mean ± SD                   | 153.7 ± 64.53     | 155.1 ± 68.71           | 148.2 ± 62.95           | 153.7 ± 64.53     | 155.1 ± 68.71           | 148.2 ± 62.95           |
| Difference from baseline,<br>LSM ± SE | 3.7 ± 3.45        | -6.1 ± 3.47             | -14.0 ± 3.48            | 9.0 ± 4.08        | -3.2 ± 4.00             | -10.4 ± 4.05            |
| 95% CI                                | -3.0 to 10.5      | -12.9 to 0.7            | -20.9 to -7.2           | 1.0 to 17.0       | -11.1 to 4.6            | -18.4 to -2.5           |
| <i>P</i> value                        | 0.28              | 0.08                    | <0.001                  | 0.028             | 0.42                    | 0.010                   |
| Difference from placebo,<br>LSM ± SE  |                   | -9.8 ± 4.67             | -17.8 ± 4.69            |                   | -12.2 ± 5.55            | -19.4 ± 5.60            |
| 95% CI                                |                   | -19.0 to -0.7           | -27.0 to -8.6           |                   | -23.1 to -1.3           | -30.4 to -8.5           |
| <i>P</i> value                        |                   | 0.036                   | <0.001                  |                   | 0.028                   | <0.001                  |
| Body weight (kg) <sup>†</sup>         |                   |                         |                         |                   |                         |                         |
| No. patients                          | 244               | 245                     | 242                     | 221               | 233                     | 224                     |
| Baseline, mean ± SD                   | 87.30 ±<br>17.709 | 86.96 ±<br>18.539       | 86.50 ±<br>18.004       | 87.30 ±<br>17.709 | 86.96 ±<br>18.539       | 86.50 ±<br>18.004       |
| Difference from baseline,<br>LSM ± SE | 0.78 ± 0.187      | -1.57 ± 0.188           | -2.67 ± 0.188           | 1.20 ± 0.249      | -1.94 ± 0.247           | -3.12 ± 0.250           |
| 95% CI                                | 0.41 to 1.15      | -1.94 to -1.20          | -3.04 to -2.30          | 0.71 to 1.69      | -2.42 to -1.45          | -3.61 to -2.63          |
| <i>P</i> value                        | <0.001            | <0.001                  | <0.001                  | <0.001            | <0.001                  | <0.001                  |

## SUPPLEMENTARY DATA

|                                                   | 24 Weeks              |                         |                         | 52 Weeks              |                         |                         |
|---------------------------------------------------|-----------------------|-------------------------|-------------------------|-----------------------|-------------------------|-------------------------|
| Characteristic                                    | Placebo               | Sotagliflozin<br>200 mg | Sotagliflozin<br>400 mg | Placebo               | Sotagliflozin<br>200 mg | Sotagliflozin<br>400 mg |
| Difference from placebo,<br>LSM $\pm$ SE          |                       | -2.35 $\pm$ 0.256       | -3.45 $\pm$ 0.256       |                       | -3.14 $\pm$ 0.344       | -4.32 $\pm$ 0.346       |
| 95% CI                                            |                       | -2.85 to -1.85          | -3.95 to -2.94          |                       | -3.81 to -2.46          | -5.00 to -3.64          |
| <i>P</i> value                                    |                       | <0.001                  | <0.001                  |                       | <0.001                  | <0.001                  |
| Percent difference from<br>baseline, LSM $\pm$ SE | 0.92 $\pm$ 0.212      | -1.87 $\pm$ 0.213       | -3.10 $\pm$ 0.213       | 1.33 $\pm$ 0.280      | -2.29 $\pm$ 0.278       | -3.62 $\pm$ 0.280       |
| 95% CI                                            | 0.50 to 1.33          | -2.29 to -1.46          | -3.52 to -2.68          | 0.79 to 1.88          | -2.84 to -1.75          | -4.17 to -3.07          |
| <i>P</i> value                                    | <0.001                | <0.001                  | <0.001                  | <0.001                | <0.001                  | <0.001                  |
| Percent difference from<br>placebo, LSM $\pm$ SE  |                       | -2.79 $\pm$ 0.290       | -4.02 $\pm$ 0.290       |                       | -3.63 $\pm$ 0.386       | -4.96 $\pm$ 0.388       |
| 95% CI                                            |                       | -3.36 to -2.22          | -4.59 to -3.45          |                       | -4.39 to -2.87          | -5.72 to -4.19          |
| <i>P</i> value                                    |                       | <0.001                  | <0.001                  |                       | <0.001                  | <0.001                  |
| Bolus insulin dose (IU) <sup>†</sup>              |                       |                         |                         |                       |                         |                         |
| No. patients                                      | 241                   | 242                     | 242                     | 216                   | 227                     | 219                     |
| Baseline, mean $\pm$ SD                           | 31.72 $\pm$<br>25.077 | 30.27 $\pm$<br>23.646   | 30.75 $\pm$<br>22.832   | 31.72 $\pm$<br>25.077 | 30.27 $\pm$<br>23.646   | 30.75 $\pm$<br>22.832   |
| Difference from baseline,<br>LSM $\pm$ SE         | -0.84 $\pm$ 0.688     | -2.33 $\pm$ 0.692       | -4.13 $\pm$ 0.692       | -0.09 $\pm$ 0.754     | -2.16 $\pm$ 0.751       | -4.65 $\pm$ 0.756       |
| 95% CI                                            | -2.19 to 0.51         | -3.69 to -0.98          | -5.49 to -2.78          | -1.57 to 1.39         | -3.63 to -0.68          | -6.13 to -3.16          |

SUPPLEMENTARY DATA

|                                               | 24 Weeks          |                         |                         | 52 Weeks          |                         |                         |
|-----------------------------------------------|-------------------|-------------------------|-------------------------|-------------------|-------------------------|-------------------------|
| Characteristic                                | Placebo           | Sotagliflozin<br>200 mg | Sotagliflozin<br>400 mg | Placebo           | Sotagliflozin<br>200 mg | Sotagliflozin<br>400 mg |
| <i>P</i> value                                | 0.22              | <0.001                  | <0.001                  | 0.90              | 0.004                   | <0.001                  |
| Difference from placebo,<br>LSM ± SE          |                   | -1.50 ± 0.917           | -3.30 ± 0.916           |                   | -2.06 ± 1.010           | -4.55 ± 1.014           |
| 95% CI                                        |                   | -3.30 to 0.30           | -5.09 to -1.50          |                   | -4.05 to -0.08          | -6.54 to -2.57          |
| <i>P</i> value                                |                   | 0.10                    | <0.001                  |                   | 0.041                   | <0.001                  |
| Percent difference from<br>baseline, LSM ± SE | 3.89 ± 2.757      | -1.80 ± 2.777           | -8.78 ± 2.780           | 7.01 ± 3.403      | 1.48 ± 3.398            | -8.63 ± 3.423           |
| 95% CI                                        | -1.52 to 9.31     | -7.25 to 3.65           | -14.23<br>to -3.32      | 0.33 to 13.69     | -5.19 to 8.15           | -15.35<br>to -1.91      |
| <i>P</i> value                                | 0.16              | 0.52                    | 0.002                   | 0.040             | 0.66                    | 0.012                   |
| Percent difference from<br>placebo, LSM ± SE  |                   | -5.70 ± 3.627           | -12.67 ±<br>3.627       |                   | -5.53 ± 4.589           | -15.63 ±<br>4.604       |
| 95% CI                                        |                   | -12.82 to 1.42          | -19.79<br>to -5.55      |                   | -14.54 to 3.48          | -24.67<br>to -6.59      |
| <i>P</i> value                                |                   | 0.12                    | <0.001                  |                   | 0.23                    | <0.001                  |
| Total daily insulin dose (IU)                 |                   |                         |                         |                   |                         |                         |
| No. patients                                  | 241               | 242                     | 242                     | 216               | 227                     | 218                     |
| Baseline, mean ± SD                           | 66.79 ±<br>41.265 | 65.11 ±<br>42.698       | 64.15 ±<br>37.636       | 66.79 ±<br>41.265 | 65.11 ±<br>42.698       | 64.15 ±<br>37.636       |

SUPPLEMENTARY DATA

|                                                   | 24 Weeks         |                         |                         | 52 Weeks         |                         |                         |
|---------------------------------------------------|------------------|-------------------------|-------------------------|------------------|-------------------------|-------------------------|
| Characteristic                                    | Placebo          | Sotagliflozin<br>200 mg | Sotagliflozin<br>400 mg | Placebo          | Sotagliflozin<br>200 mg | Sotagliflozin<br>400 mg |
| Difference from baseline,<br>LSM $\pm$ SE         | 0.81 $\pm$ 0.848 | -2.17 $\pm$ 0.852       | -5.54 $\pm$ 0.853       | 2.52 $\pm$ 0.988 | -2.07 $\pm$ 0.984       | -6.22 $\pm$ 0.991       |
| 95% CI                                            | -0.85 to 2.48    | -3.84 to -0.50          | -7.22 to -3.87          | 0.58 to 4.46     | -4.00 to -0.14          | -8.17 to -4.28          |
| <i>P</i> value                                    | 0.34             | 0.011                   | <0.001                  | 0.011            | 0.036                   | <0.001                  |
| Difference from placebo,<br>LSM $\pm$ SE          |                  | -2.98 $\pm$ 1.131       | -6.36 $\pm$ 1.131       |                  | -4.59 $\pm$ 1.334       | -8.74 $\pm$ 1.339       |
| 95% CI                                            |                  | -5.20 to -0.76          | -8.58 to -4.14          |                  | -7.21 to -1.97          | -11.37<br>to -6.12      |
| <i>P</i> value                                    |                  | 0.009                   | <0.001                  |                  | <0.001                  | <0.001                  |
| Percent difference from<br>baseline, LSM $\pm$ SE | 1.91 $\pm$ 1.093 | -4.26 $\pm$ 1.099       | -7.79 $\pm$ 1.099       | 4.15 $\pm$ 1.242 | -3.87 $\pm$ 1.234       | -8.50 $\pm$ 1.247       |
| 95% CI                                            | -0.24 to 4.05    | -6.41 to -2.10          | -9.95 to -5.63          | 1.71 to 6.59     | -6.29 to -1.45          | -10.94<br>to -6.05      |
| <i>P</i> value                                    | 0.08             | <0.001                  | <0.001                  | <0.001           | 0.002                   | <0.001                  |
| Percent difference from<br>placebo, LSM $\pm$ SE  |                  | -6.16 $\pm$ 1.450       | -9.70 $\pm$ 1.450       |                  | -8.02 $\pm$ 1.663       | -12.64 $\pm$<br>1.672   |
| (95% CI)                                          |                  | -9.01 to -3.32          | -12.54<br>to -6.85      |                  | -11.28<br>to -4.75      | -15.93<br>to -9.36      |

SUPPLEMENTARY DATA

|                                                   | 24 Weeks              |                         |                         | 52 Weeks              |                         |                         |
|---------------------------------------------------|-----------------------|-------------------------|-------------------------|-----------------------|-------------------------|-------------------------|
| Characteristic                                    | Placebo               | Sotagliflozin<br>200 mg | Sotagliflozin<br>400 mg | Placebo               | Sotagliflozin<br>200 mg | Sotagliflozin<br>400 mg |
| <i>P</i> value                                    |                       | <0.001                  | <0.001                  |                       | <0.001                  | <0.001                  |
| Basal insulin dose (IU)                           |                       |                         |                         |                       |                         |                         |
| No. patients                                      | 241                   | 243                     | 242                     | 217                   | 228                     | 219                     |
| Baseline, mean $\pm$ SD                           | 35.06 $\pm$<br>19.733 | 34.84 $\pm$<br>23.903   | 33.39 $\pm$<br>18.956   | 35.06 $\pm$<br>19.733 | 34.84 $\pm$<br>23.903   | 33.39 $\pm$<br>18.956   |
| Difference from baseline,<br>LSM $\pm$ SE         | 1.48 $\pm$ 0.417      | -0.26 $\pm$ 0.418       | -1.50 $\pm$ 0.418       | 2.44 $\pm$ 0.502      | -0.36 $\pm$ 0.500       | -1.91 $\pm$ 0.504       |
| 95% CI                                            | 0.66 to 2.30          | -1.08 to 0.56           | -2.32 to -0.68          | 1.45 to 3.43          | -1.34 to 0.62           | -2.90 to -0.93          |
| <i>P</i> value                                    | <0.001                | 0.54                    | <0.001                  | <0.001                | 0.47                    | <0.001                  |
| Difference from placebo,<br>LSM $\pm$ SE          |                       | -1.74 $\pm$ 0.558       | -2.98 $\pm$ 0.558       |                       | -2.80 $\pm$ 0.681       | -4.35 $\pm$ 0.684       |
| 95% CI                                            |                       | -2.83 to -0.64          | -4.08 to -1.89          |                       | -4.14 to -1.47          | -5.70 to -3.01          |
| <i>P</i> value                                    |                       | 0.002                   | <0.001                  |                       | <0.001                  | <0.001                  |
| Percent difference from<br>baseline, LSM $\pm$ SE | 3.77 $\pm$ 1.252      | -1.73 $\pm$ 1.261       | -5.35 $\pm$ 1.265       | 5.99 $\pm$ 1.467      | -1.70 $\pm$ 1.464       | -5.87 $\pm$ 1.478       |
| 95% CI                                            | 1.31 to 6.23          | -4.21 to 0.74           | -7.83 to -2.86          | 3.11 to 8.87          | -4.57 to 1.18           | -8.77 to -2.97          |
| <i>P</i> value                                    | 0.003                 | 0.17                    | <0.001                  | <0.001                | 0.25                    | <0.001                  |
| Percent difference from<br>placebo, LSM $\pm$ SE  |                       | -5.51 $\pm$ 1.633       | -9.12 $\pm$ 1.634       |                       | -7.69 $\pm$ 1.950       | -11.87 $\pm$<br>1.959   |

SUPPLEMENTARY DATA

|                                                          | 24 Weeks      |                         |                         | 52 Weeks      |                         |                         |
|----------------------------------------------------------|---------------|-------------------------|-------------------------|---------------|-------------------------|-------------------------|
| Characteristic                                           | Placebo       | Sotagliflozin<br>200 mg | Sotagliflozin<br>400 mg | Placebo       | Sotagliflozin<br>200 mg | Sotagliflozin<br>400 mg |
| 95% CI                                                   |               | -8.71 to -2.30          | -12.32<br>to -5.91      |               | -11.52<br>to -3.86      | -15.71<br>to -8.02      |
| <i>P</i> value                                           |               | <0.001                  | <0.001                  |               | <0.001                  | <0.001                  |
| SBP, mITT population (mm Hg)                             |               |                         |                         |               |                         |                         |
| No. patients (week 12, week 52)                          | 251           | 247                     | 253                     | 221           | 233                     | 224                     |
| Baseline, mean ± SD                                      | 120.9 ± 13.47 | 120.0 ± 14.84           | 119.5 ± 14.73           | 120.9 ± 13.47 | 120.0 ± 14.84           | 119.5 ± 14.73           |
| Difference from baseline<br>(week 12, week 52), LSM ± SE | 1.0 ± 0.66    | -2.5 ± 0.67             | -3.2 ± 0.66             | 1.7 ± 0.74    | -1.1 ± 0.73             | -2.7 ± 0.74             |
| 95% CI                                                   | -0.3 to 2.3   | -3.8 to -1.2            | -4.5 to -1.9            | 0.3 to 3.1    | -2.5 to 0.3             | -4.2 to -1.3            |
| <i>P</i> value                                           | 0.14          | <0.001                  | <0.001                  | 0.021         | 0.14                    | <0.001                  |
| Difference from placebo,<br>LSM ± SE                     |               | -3.5 ± 0.88             | -4.2 ± 0.88             |               | -2.8 ± 0.99             | -4.4 ± 0.99             |
| 95% CI                                                   |               | -5.2 to -1.8            | -5.9 to -2.4            |               | -4.7 to -0.9            | -6.4 to -2.5            |
| <i>P</i> value                                           |               | <0.001                  | <0.001                  |               | 0.005                   | <0.001                  |
| DBP, mITT population (mm Hg)                             |               |                         |                         |               |                         |                         |
| No. patients (week 12, week 52)                          | 251           | 247                     | 253                     | 221           | 233                     | 224                     |



## SUPPLEMENTARY DATA

|                                                                 | 24 Weeks         |                         |                         | 52 Weeks         |                         |                         |
|-----------------------------------------------------------------|------------------|-------------------------|-------------------------|------------------|-------------------------|-------------------------|
| Characteristic                                                  | Placebo          | Sotagliflozin<br>200 mg | Sotagliflozin<br>400 mg | Placebo          | Sotagliflozin<br>200 mg | Sotagliflozin<br>400 mg |
| Baseline, mean $\pm$ SD                                         | 76.4 $\pm$ 8.24  | 76.4 $\pm$ 9.28         | 75.3 $\pm$ 9.17         | 76.4 $\pm$ 8.24  | 76.4 $\pm$ 9.28         | 75.3 $\pm$ 9.17         |
| Difference from baseline<br>(week 12, week 52), LSM $\pm$<br>SE | 0.8 $\pm$ 0.41   | -1.0 $\pm$ 0.42         | -1.1 $\pm$ 0.41         | 0.9 $\pm$ 0.46   | -0.6 $\pm$ 0.46         | -1.4 $\pm$ 0.46         |
| 95% CI                                                          | -0.0 to 1.6      | -1.8 to -0.2            | -1.9 to -0.3            | -0.0 to 1.8      | -1.5 to 0.3             | -2.3 to -0.5            |
| <i>P</i> value                                                  | 0.051            | 0.019                   | 0.009                   | 0.06             | 0.22                    | 0.003                   |
| Difference from placebo,<br>LSM $\pm$ SE                        |                  | -1.8 $\pm$ 0.54         | -1.9 $\pm$ 0.54         |                  | -1.4 $\pm$ 0.61         | -2.3 $\pm$ 0.62         |
| 95% CI                                                          |                  | -2.8 to -0.7            | -2.9 to -0.8            |                  | -2.6 to -0.2            | -3.5 to -1.0            |
| <i>P</i> value                                                  |                  | 0.001                   | <0.001                  |                  | 0.020                   | <0.001                  |
| SBP, patients with baseline SBP<br>$\geq$ 130 mm Hg (mm Hg)     |                  |                         |                         |                  |                         |                         |
| No. patients (week 12, week<br>52)                              | 58               | 54                      | 60                      | 51               | 55                      | 56                      |
| Baseline, mean $\pm$ SD                                         | 139.1 $\pm$ 7.98 | 140.7 $\pm$ 9.92        | 139.8 $\pm$ 9.35        | 139.1 $\pm$ 7.98 | 140.7 $\pm$ 9.92        | 139.8 $\pm$ 9.35        |
| Difference from baseline<br>(week 12, week 52), LSM $\pm$<br>SE | -4.4 $\pm$ 1.64  | -9.9 $\pm$ 1.72         | -11.0 $\pm$ 1.61        | -7.3 $\pm$ 1.70  | -9.5 $\pm$ 1.69         | -11.0 $\pm$ 1.64        |
| 95% CI                                                          | -7.7 to -1.2     | -13.2 to -6.5           | -14.2 to -7.8           | -10.6 to -3.9    | -12.8 to -6.1           | -14.3 to -7.8           |

SUPPLEMENTARY DATA

|                                       | 24 Weeks             |                         |                         | 52 Weeks             |                         |                         |
|---------------------------------------|----------------------|-------------------------|-------------------------|----------------------|-------------------------|-------------------------|
| Characteristic                        | Placebo              | Sotagliflozin<br>200 mg | Sotagliflozin<br>400 mg | Placebo              | Sotagliflozin<br>200 mg | Sotagliflozin<br>400 mg |
| <i>P</i> value                        | 0.008                | <0.001                  | <0.001                  | <0.001               | <0.001                  | <0.001                  |
| Difference from placebo,<br>LSM ± SE  |                      | -5.4 ± 2.25             | -6.6 ± 2.18             |                      | -2.2 ± 2.28             | -3.7 ± 2.26             |
| (95% CI)                              |                      | -9.9 to -1.0            | -10.9 to -2.3           |                      | -6.7 to 2.3             | -8.2 to 0.7             |
| <i>P</i> value                        |                      | 0.017                   | 0.003                   |                      | 0.34                    | 0.10                    |
| Urine ACR (mg/mmol)                   |                      |                         |                         |                      |                         |                         |
| No. patients                          | 243                  | 244                     | 237                     | 214                  | 232                     | 215                     |
| Baseline, mean ± SD                   | 3.2261 ±<br>13.68241 | 4.3769 ±<br>19.55254    | 1.8873 ±<br>5.58182     | 3.2261 ±<br>13.68241 | 4.3769 ±<br>19.55254    | 1.8873 ±<br>5.58182     |
| Difference from baseline,<br>LSM ± SE | -0.2516 ±<br>0.44128 | 0.1500 ±<br>0.44482     | -0.0233 ±<br>0.44983    | 0.4133 ±<br>1.25487  | 1.9187 ±<br>1.20947     | 0.1968 ±<br>1.25465     |
| 95% CI                                | -1.1178 to<br>0.6145 | -0.7231 to<br>1.0231    | -0.9062 to<br>0.8597    | -2.0507 to<br>2.8772 | -0.4561 to<br>4.2934    | -2.2667 to<br>2.6603    |
| <i>P</i> value                        | 0.57                 | 0.74                    | 0.96                    | 0.74                 | 0.11                    | 0.88                    |
| Difference from placebo,<br>LSM ± SE  |                      | 0.4016 ±<br>0.58174     | 0.2284 ±<br>0.58623     |                      | 1.5054 ±<br>1.73043     | -0.2165 ±<br>1.75905    |
| 95% CI                                |                      | -0.7404 to<br>1.5437    | -0.9225 to<br>1.3793    |                      | -1.8924 to<br>4.9032    | -3.6705 to<br>3.2376    |
| <i>P</i> value                        |                      | 0.49                    | 0.70                    |                      | 0.38                    | 0.90                    |

## SUPPLEMENTARY DATA

|                                                                             | 24 Weeks          |                         |                         | 52 Weeks          |                         |                         |
|-----------------------------------------------------------------------------|-------------------|-------------------------|-------------------------|-------------------|-------------------------|-------------------------|
| Characteristic                                                              | Placebo           | Sotagliflozin<br>200 mg | Sotagliflozin<br>400 mg | Placebo           | Sotagliflozin<br>200 mg | Sotagliflozin<br>400 mg |
| eGFR (mL/min/1.73 m <sup>2</sup> )                                          |                   |                         |                         |                   |                         |                         |
| No. patients                                                                | 244               | 243                     | 239                     | 217               | 233                     | 223                     |
| Baseline, mean ± SD                                                         | 87.58 ±<br>18.465 | 87.04 ±<br>20.182       | 86.58 ±<br>18.933       | 87.58 ±<br>18.465 | 87.04 ±<br>20.182       | 86.58 ±<br>18.933       |
| Difference from baseline, <sup>‡</sup><br>LSM ± SD                          | -0.20 ± 0.684     | -2.18 ± 0.690           | -2.35 ± 0.694           | -1.06 ± 0.722     | -2.46 ± 0.713           | -2.16 ± 0.722           |
| 95% CI                                                                      | -1.54 to 1.14     | -3.53 to -0.82          | -3.71 to -0.99          | -2.48 to 0.36     | -3.86 to -1.06          | -3.58 to -0.74          |
| <i>P</i> value                                                              | 0.77              | 0.002                   | <0.001                  | 0.14              | <0.001                  | 0.003                   |
| Difference from placebo,<br>LSM ± SD                                        |                   | -1.98 ± 0.904           | -2.15 ± 0.906           |                   | -1.40 ± 0.951           | -1.10 ± 0.957           |
| 95% CI                                                                      |                   | -3.75 to -0.20          | -3.93 to -0.37          |                   | -3.27 to 0.46           | -2.98 to 0.78           |
| <i>P</i> value                                                              |                   | 0.029                   | 0.018                   |                   | 0.14                    | 0.25                    |
| Documented blood glucose ≤3.9<br>mmol/L (≤70 mg/dL)<br>(events/patient/day) |                   |                         |                         |                   |                         |                         |
| No. patients                                                                | 249               | 244                     | 239                     | 238               | 245                     | 237                     |
| Baseline, mean ± SD                                                         | 0.339 ±<br>0.3489 | 0.341 ±<br>0.3407       | 0.334<br>± 0.3368       | 0.339 ±<br>0.3489 | 0.341 ±<br>0.3407       | 0.334<br>± 0.3368       |
| Difference from baseline,                                                   | -0.057 ±          | -0.096 ±                | -0.095 ±                | -0.130 ±          | -0.163 ±                | -0.167 ±                |

SUPPLEMENTARY DATA

|                                                                                  | 24 Weeks            |                         |                         | 52 Weeks            |                         |                         |
|----------------------------------------------------------------------------------|---------------------|-------------------------|-------------------------|---------------------|-------------------------|-------------------------|
| Characteristic                                                                   | Placebo             | Sotagliflozin<br>200 mg | Sotagliflozin<br>400 mg | Placebo             | Sotagliflozin<br>200 mg | Sotagliflozin<br>400 mg |
| LSM $\pm$ SD                                                                     | 0.0198              | 0.0200                  | 0.0202                  | 0.0166              | 0.0164                  | 0.0167                  |
| 95% CI                                                                           | -0.096<br>to -0.018 | -0.136<br>to -0.057     | -0.135<br>to -0.056     | -0.163<br>to -0.098 | -0.195<br>to -0.131     | -0.200<br>to -0.134     |
| <i>P</i> value                                                                   | 0.004               | <0.001                  | <0.001                  | <0.001              | <0.001                  | <0.001                  |
| Difference from placebo,<br>LSM $\pm$ SD                                         |                     | -0.039 $\pm$<br>0.0269  | -0.038 $\pm$<br>0.0270  |                     | -0.033 $\pm$<br>0.0222  | -0.037 $\pm$<br>0.0224  |
| 95% CI                                                                           |                     | -0.092 to<br>0.014      | -0.091 to<br>0.015      |                     | -0.076 to<br>0.011      | -0.081 to<br>0.007      |
| <i>P</i> value                                                                   |                     | 0.15                    | 0.16                    |                     | 0.14                    | 0.10                    |
| Documented blood glucose $\leq$ 3.9<br>mmol/L ( $\leq$ 70 mg/dL) (event<br>rate) |                     |                         |                         |                     |                         |                         |
| No. patients                                                                     | 268                 | 263                     | 262                     | 268                 | 263                     | 262                     |
| Patients with events, n (%)                                                      | 265 (98.9)          | 260 (98.9)              | 257 (98.1)              | 266 (99.3)          | 260 (98.9)              | 258 (98.5)              |
| Events per person-year                                                           | 102.0               | 93.1                    | 99.4                    | 96.1                | 84.1                    | 90.0                    |
| Event rate                                                                       | 90.23               | 82.57                   | 87.81                   | 86.44               | 75.66                   | 80.52                   |
| 95% CI                                                                           | 81.47 to<br>99.93   | 74.30 to<br>91.76       | 79.07 to<br>97.51       | 78.18 to<br>95.56   | 68.22 to<br>83.90       | 72.66 to<br>89.24       |

SUPPLEMENTARY DATA

|                                                                                          | 24 Weeks               |                         |                         | 52 Weeks               |                         |                         |
|------------------------------------------------------------------------------------------|------------------------|-------------------------|-------------------------|------------------------|-------------------------|-------------------------|
| Characteristic                                                                           | Placebo                | Sotagliflozin<br>200 mg | Sotagliflozin<br>400 mg | Placebo                | Sotagliflozin<br>200 mg | Sotagliflozin<br>400 mg |
| Relative rate                                                                            |                        | 0.92                    | 0.97                    |                        | 0.88                    | 0.93                    |
| 95% CI                                                                                   |                        | 0.80 to 1.04            | 0.85 to 1.11            |                        | 0.77 to 0.99            | 0.82 to 1.06            |
| <i>P</i> value vs placebo                                                                |                        | 0.18                    | 0.68                    |                        | 0.040                   | 0.28                    |
| Documented blood glucose $\leq 3.0$<br>mmol/L ( $\leq 55$ mg/dL)<br>(events/patient/day) |                        |                         |                         |                        |                         |                         |
| No. patients                                                                             | 249                    | 244                     | 239                     | 238                    | 245                     | 237                     |
| Baseline, mean $\pm$ SD                                                                  | 0.070 $\pm$<br>0.1600  | 0.068 $\pm$<br>0.1372   | 0.065 $\pm$<br>0.1407   | 0.070 $\pm$<br>0.1600  | 0.068 $\pm$<br>0.1372   | 0.065 $\pm$<br>0.1407   |
| Difference from baseline,<br>LSM $\pm$ SD                                                | -0.011 $\pm$<br>0.0069 | -0.024 $\pm$<br>0.0070  | -0.021 $\pm$<br>0.0071  | -0.017 $\pm$<br>0.0060 | -0.037 $\pm$<br>0.0059  | -0.041 $\pm$<br>0.0060  |
| 95% CI                                                                                   | -0.025 to<br>0.002     | -0.038<br>to -0.010     | -0.035<br>to -0.007     | -0.028<br>to -0.005    | -0.049<br>to -0.026     | -0.053<br>to -0.030     |
| <i>P</i> value                                                                           | 0.10                   | <0.001                  | 0.003                   | 0.005                  | <0.001                  | <0.001                  |
| Difference from placebo,<br>LSM $\pm$ SD                                                 |                        | -0.012 $\pm$<br>0.0095  | -0.010 $\pm$<br>0.0095  |                        | -0.020 $\pm$<br>0.0080  | -0.025 $\pm$<br>0.0081  |
| 95% CI                                                                                   |                        | -0.031 to<br>0.006      | -0.028 to<br>0.009      |                        | -0.036<br>to -0.005     | -0.041<br>to -0.009     |
| <i>P</i> value                                                                           |                        | 0.20                    | 0.31                    |                        | 0.011                   | 0.002                   |

## SUPPLEMENTARY DATA

|                                                                            | 24 Weeks          |                         |                         | 52 Weeks          |                         |                         |
|----------------------------------------------------------------------------|-------------------|-------------------------|-------------------------|-------------------|-------------------------|-------------------------|
| Characteristic                                                             | Placebo           | Sotagliflozin<br>200 mg | Sotagliflozin<br>400 mg | Placebo           | Sotagliflozin<br>200 mg | Sotagliflozin<br>400 mg |
| Documented blood glucose $\leq 3.0$ mmol/L ( $\leq 55$ mg/dL) (event rate) |                   |                         |                         |                   |                         |                         |
| No. patients                                                               | 268               | 263                     | 262                     | 268               | 263                     | 262                     |
| Patients with events, n (%)                                                | 238 (88.8)        | 237 (90.1)              | 228 (87.0)              | 248 (92.5)        | 250 (95.1)              | 244 (93.1)              |
| Events per person-year                                                     | 18.8              | 16.6                    | 17.4                    | 18.1              | 14.9                    | 15.8                    |
| Event rate                                                                 | 17.35             | 15.08                   | 16.06                   | 17.10             | 13.72                   | 14.82                   |
| 95% CI                                                                     | 14.95 to<br>20.13 | 12.91 to<br>17.62       | 13.78 to<br>18.71       | 14.85 to<br>19.69 | 11.85 to<br>15.88       | 12.83 to<br>17.12       |
| Relative rate                                                              |                   | 0.87                    | 0.93                    |                   | 0.80                    | 0.87                    |
| 95% CI                                                                     |                   | 0.72 to 1.05            | 0.77 to 1.12            |                   | 0.67 to 0.96            | 0.72 to 1.04            |
| <i>P</i> value vs placebo                                                  |                   | 0.15                    | 0.42                    |                   | 0.016                   | 0.12                    |
| DTSQs score <sup>†§</sup>                                                  |                   |                         |                         |                   |                         |                         |
| No. patients                                                               | 237               | 240                     | 233                     | —                 | —                       | —                       |
| Baseline, mean $\pm$ SD                                                    | 28.9 $\pm$ 4.66   | 28.4 $\pm$ 5.29         | 29.2 $\pm$ 4.80         | —                 | —                       | —                       |
| Difference from baseline, LSM $\pm$ SE                                     | -0.4 $\pm$ 0.30   | 2.1 $\pm$ 0.31          | 2.1 $\pm$ 0.31          | —                 | —                       | —                       |
| 95% CI                                                                     | -1.0 to 0.2       | 1.5 to 2.7              | 1.5 to 2.8              | —                 | —                       | —                       |

## SUPPLEMENTARY DATA

|                                       | 24 Weeks   |                         |                         | 52 Weeks    |                         |                         |
|---------------------------------------|------------|-------------------------|-------------------------|-------------|-------------------------|-------------------------|
| Characteristic                        | Placebo    | Sotagliflozin<br>200 mg | Sotagliflozin<br>400 mg | Placebo     | Sotagliflozin<br>200 mg | Sotagliflozin<br>400 mg |
| <i>P</i> value                        | 0.20       | <0.001                  | <0.001                  | —           | —                       | —                       |
| Difference from placebo,<br>LSM ± SE  |            | 2.5 ± 0.40              | 2.5 ± 0.40              | —           | —                       | —                       |
| 95% CI                                |            | 1.7 to 3.3              | 1.8 to 3.3              | —           | —                       | —                       |
| <i>P</i> value                        |            | <0.001                  | <0.001                  | —           | —                       | —                       |
| DDS2 score <sup>†</sup>               |            |                         |                         |             |                         |                         |
| No. patients                          | 243        | 244                     | 242                     | 217         | 228                     | 222                     |
| Baseline, mean ± SD                   | 5.0 ± 2.18 | 5.1 ± 1.97              | 4.9 ± 2.15              | 5.0 ± 2.18  | 5.1 ± 1.97              | 4.9 ± 2.15              |
| Difference from baseline,<br>LSM ± SE | 0.3 ± 0.11 | -0.4 ± 0.11             | -0.5 ± 0.11             | 0.1 ± 0.11  | -0.3 ± 0.11             | -0.4 ± 0.11             |
| 95% CI                                | 0.1 to 0.5 | -0.6 to -0.2            | -0.7 to -0.3            | -0.1 to 0.3 | -0.6 to -0.1            | -0.6 to -0.2            |
| <i>P</i> value                        | 0.010      | <0.001                  | <0.001                  | 0.37        | 0.002                   | <0.001                  |
| Difference from placebo,<br>LSM ± SE  |            | -0.7 ± 0.14             | -0.8 ± 0.14             |             | -0.4 ± 0.15             | -0.5 ± 0.15             |
| 95% CI                                |            | -0.9 to -0.4            | -1.0 to -0.5            |             | -0.7 to -0.2            | -0.8 to -0.2            |
| <i>P</i> value                        |            | <0.001                  | <0.001                  |             | 0.003                   | <0.001                  |

\*Primary endpoint.

<sup>†</sup>Secondary endpoint.

## SUPPLEMENTARY DATA

<sup>‡</sup>The mean  $\pm$  SD change from baseline in eGFR at week 53 was  $-3.87 \pm 10.047$  mL/min/1.73 m<sup>2</sup> for the placebo group,  $0.67 \pm 9.329$  mL/min/1.73 m<sup>2</sup> for the sotagliflozin 200 mg group, and  $-1.35 \pm 9.539$  mL/min/1.73 m<sup>2</sup> for the sotagliflozin 400 mg group.

<sup>§</sup>Assessed only at week 24.

Abbreviations: ACR, albumin-creatinine ratio; Ca/Cr, calcium-creatinine ratio; DBP, diastolic blood pressure; DTSQs, Diabetes Treatment Satisfaction Questionnaire status; DDS2, 2-item Diabetes Distress Screening Scale; eGFR, estimated glomerular filtration rate; FPG, fasting plasma glucose; GCR, glucose-creatinine ratio; SBP, systolic blood pressure.



# SUPPLEMENTARY DATA

Table 3. Changes in CGM values at week 24.

|                                              | <b>Placebo</b><br><b>(n=45)</b>   | <b>Sotagliflozin 200</b><br><b>mg</b><br><b>(n=44)</b> | <b>Sotagliflozin 400</b><br><b>mg</b><br><b>(n=47)</b> |
|----------------------------------------------|-----------------------------------|--------------------------------------------------------|--------------------------------------------------------|
| Mean daily glucose, mmol/L ± SD (mg/dL ± SD) |                                   |                                                        |                                                        |
| No. patients                                 | 36                                | 37                                                     | 37                                                     |
| Mean baseline                                | 9.45 ± 1.56<br>(170.31 ± 28.184)  | 9.57 ± 1.80<br>(172.42 ± 32.347)                       | 9.54 ± 1.39<br>(171.84 ± 25.050)                       |
| Difference from baseline,<br>LSM ± SE        | 0.11 ± 0.25<br>(1.93 ± 4.455)     | -0.17 ± 0.25<br>(-2.97 ± 4.450)                        | -0.86 ± 0.25<br>(-15.57 ± 4.517)                       |
| 95% CI                                       | -0.38 to 0.60<br>(-6.89 to 10.75) | -0.65 to 0.32<br>(-11.78 to 5.83)                      | -1.36 to -0.37<br>(-24.50 to -6.63)                    |
| <i>P</i> value                               | 0.67                              | 0.51                                                   | <0.001                                                 |
| Difference from placebo                      |                                   | -0.27 ± 0.32<br>(-4.91 ± 5.810)                        | -0.97 ± 0.32<br>(-17.50 ± 5.821)                       |
| 95% CI                                       |                                   | -0.91 to 0.37<br>(-16.42 to 6.61)                      | -1.61 to -0.33<br>(-29.04 to -5.96)                    |
| <i>P</i> value                               |                                   | 0.40                                                   | 0.003                                                  |
| MAGE, mmol/L ± SD (mg/dL ± SD)               |                                   |                                                        |                                                        |
| No. patients                                 | 36                                | 37                                                     | 37                                                     |

SUPPLEMENTARY DATA

|                                                                           | <b>Placebo</b><br><b>(n=45)</b>   | <b>Sotagliflozin 200</b><br><b>mg</b><br><b>(n=44)</b> | <b>Sotagliflozin 400</b><br><b>mg</b><br><b>(n=47)</b> |
|---------------------------------------------------------------------------|-----------------------------------|--------------------------------------------------------|--------------------------------------------------------|
| Mean baseline                                                             | 8.90 ± 1.84<br>(160.32 ± 33.146)  | 9.07 ± 1.84<br>(163.43 ± 33.086)                       | 8.74 ± 1.89<br>(157.40 ± 34.113)                       |
| Difference from baseline,<br>LSM ± SE                                     | -0.24 ± 0.32<br>(-4.29 ± 5.762)   | -0.49 ± 0.32<br>(-8.79 ± 5.782)                        | -1.44 ± 0.32<br>(-25.86 ± 5.849)                       |
| 95% CI                                                                    | -0.87 to 0.40<br>(-15.70 to 7.12) | -1.12 to 0.15<br>(-20.23 to 2.65)                      | -2.08 to -0.79<br>(-37.43 to -14.29)                   |
| <i>P</i> value                                                            | 0.46                              | 0.13                                                   | <0.001                                                 |
| Difference from placebo                                                   |                                   | -0.25 ± 0.41<br>(-4.50 ± 7.409)                        | -1.20 ± 0.41<br>(-21.57 ± 7.418)                       |
| 95% CI                                                                    |                                   | -1.06 to 0.57<br>(-19.19 to 10.19)                     | -2.01 to -0.38<br>(-36.27 to -6.86)                    |
| <i>P</i> value                                                            |                                   | 0.54                                                   | 0.004                                                  |
| Percent time in range (3.9-10.0<br>mmol/L [70 to 180 mg/dL]), per<br>24 h |                                   |                                                        |                                                        |
| No. patients                                                              | 36                                | 37                                                     | 37                                                     |
| Mean baseline                                                             | 54.19 ± 12.941                    | 53.95 ± 14.963                                         | 53.18 ± 13.892                                         |
| Difference from baseline,<br>LSM ± SE                                     | -1.83 ± 2.230                     | 1.21 ± 2.231                                           | 8.56 ± 2.269                                           |
| (95% CI)                                                                  | -6.25 to 2.58                     | -3.21 to 5.62                                          | 4.08 to 13.05                                          |

SUPPLEMENTARY DATA

|                                                                    | <b>Placebo</b><br><b>(n=45)</b>         | <b>Sotagliflozin 200</b><br><b>mg</b><br><b>(n=44)</b> | <b>Sotagliflozin 400</b><br><b>mg</b><br><b>(n=47)</b> |
|--------------------------------------------------------------------|-----------------------------------------|--------------------------------------------------------|--------------------------------------------------------|
| Hours per day<br>corresponding to percent<br>time per day $\pm$ SE | $-0.44 \pm 0.54$                        | $0.29 \pm 0.54$                                        | $2.05 \pm 0.54$                                        |
| <i>P</i> value                                                     | 0.41                                    | 0.59                                                   | <0.001                                                 |
| Difference from placebo                                            |                                         | $3.04 \pm 2.882$                                       | $10.40 \pm 2.885$                                      |
| (95% CI)                                                           |                                         | -2.67 to 8.75                                          | 4.68 to 16.12                                          |
| Hours per day<br>corresponding to percent<br>time per day $\pm$ SE |                                         | $0.73 \pm 0.69$                                        | $2.50 \pm 0.69$                                        |
| <i>P</i> value                                                     |                                         | 0.29                                                   | <0.001                                                 |
| Standard deviation, mmol/L $\pm$<br>SD (mg/dL $\pm$ SD)            |                                         |                                                        |                                                        |
| No. patients                                                       | 36                                      | 37                                                     | 37                                                     |
| Mean baseline                                                      | $3.51 \pm 0.72$<br>(63.28 $\pm$ 12.905) | $3.58 \pm 0.71$<br>(64.55 $\pm$ 12.814)                | $3.43 \pm 0.72$<br>(61.87 $\pm$ 13.032)                |
| Difference from baseline,<br>LSM $\pm$ SE                          | $-0.08 \pm 0.13$<br>(-1.37 $\pm$ 2.359) | $-0.13 \pm 0.13$<br>(-2.39 $\pm$ 2.360)                | $-0.44 \pm 0.13$<br>(-7.97 $\pm$ 2.387)                |
| 95% CI                                                             | -0.33 to 0.18<br>(-6.04 to 3.30)        | -0.39 to 0.13<br>(-7.06 to 2.28)                       | -0.70 to -0.18<br>(-12.69 to -3.24)                    |
| <i>P</i> value                                                     | 0.56                                    | 0.31                                                   | 0.001                                                  |

SUPPLEMENTARY DATA

|                                                   | <b>Placebo<br/>(n=45)</b>        | <b>Sotagliflozin 200<br/>mg<br/>(n=44)</b> | <b>Sotagliflozin 400<br/>mg<br/>(n=47)</b> |
|---------------------------------------------------|----------------------------------|--------------------------------------------|--------------------------------------------|
| Difference from placebo                           |                                  | -0.06 ± 0.17<br>(-1.03 ± 3.048)            | -0.37 ± 0.17<br>(-6.60 ± 3.055)            |
| 95% CI                                            |                                  | -0.39 to 0.28<br>(-7.07 to 5.02)           | -0.70 to -0.03<br>(-12.66 to -0.55)        |
| <i>P</i> value                                    |                                  | 0.74                                       | 0.033                                      |
| 2-h PPG, mmol/L ± SD (mg/dL<br>± SD) <sup>†</sup> |                                  |                                            |                                            |
| No. patients (per-protocol<br>population)         | 28                               | 28                                         | 30                                         |
| Mean baseline                                     | 13.15 ± 5.386<br>(236.8 ± 97.04) | 11.99 ± 4.662<br>(215.8 ± 83.87)           | 11.16 ± 3.708<br>(200.9 ± 66.85)           |
| Difference from baseline,<br>LSM ± SE             | -1.03 ± 0.812<br>(-18.5 ± 14.62) | -1.99 ± 0.845<br>(-35.7 ± 15.21)           | -2.24 ± 0.833<br>(-40.2 ± 14.99)           |
| 95% CI                                            | -2.64 to 0.59<br>(-47.5 to 10.6) | -3.67 to -0.31<br>(-66.0 to -5.4)          | -3.90 to -0.58<br>(-70.0 to -10.4)         |
| <i>P</i> value                                    | 0.21                             | 0.021                                      | 0.009                                      |
| Difference from placebo                           |                                  | -0.96 ± 1.018<br>(-17.3 ± 18.32)           | -1.21 ± 1.011<br>(-21.7 ± 18.20)           |
| 95% CI                                            |                                  | -2.99 to 1.06<br>(-53.7 to 19.2)           | -3.23 to 0.80<br>(-58.0 to 14.5)           |

# SUPPLEMENTARY DATA

|                | <b>Placebo</b><br><b>(n=45)</b> | <b>Sotagliflozin 200</b><br><b>mg</b><br><b>(n=44)</b> | <b>Sotagliflozin 400</b><br><b>mg</b><br><b>(n=47)</b> |
|----------------|---------------------------------|--------------------------------------------------------|--------------------------------------------------------|
| <i>P</i> value |                                 | 0.35                                                   | 0.24                                                   |

CGM, continuous glucose monitoring; CI, confidence interval; LSM, least squares mean;

MAGE, mean amplitude of glucose excursions PPG, postprandial glucose.

<sup>†</sup>In order to assess the change in PPG under standardized conditions, the per-protocol population was selected; 2-h PPG values were obtained after a standardized mixed meal.

# SUPPLEMENTARY DATA

Figure 2. LSM percent (A) and absolute (B) change from baseline in insulin dose at 24 and 52 weeks. Baseline values are IU/day.

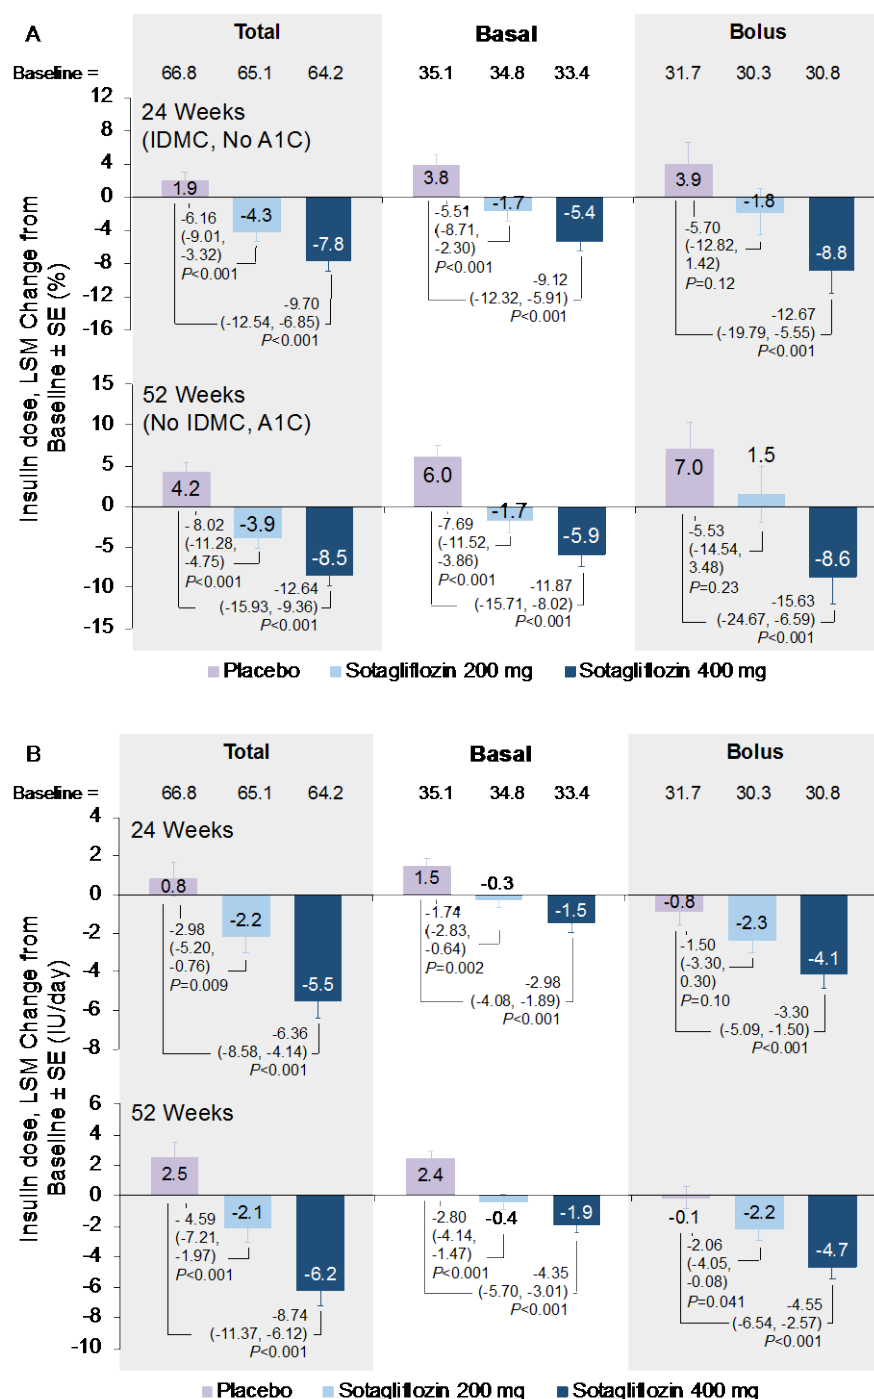

SUPPLEMENTARY DATA

Figure 3. Least squares mean (LSM) change from baseline in estimated glomerular filtration rate (eGFR) over 52 weeks. Error bars represent standard error (SE).

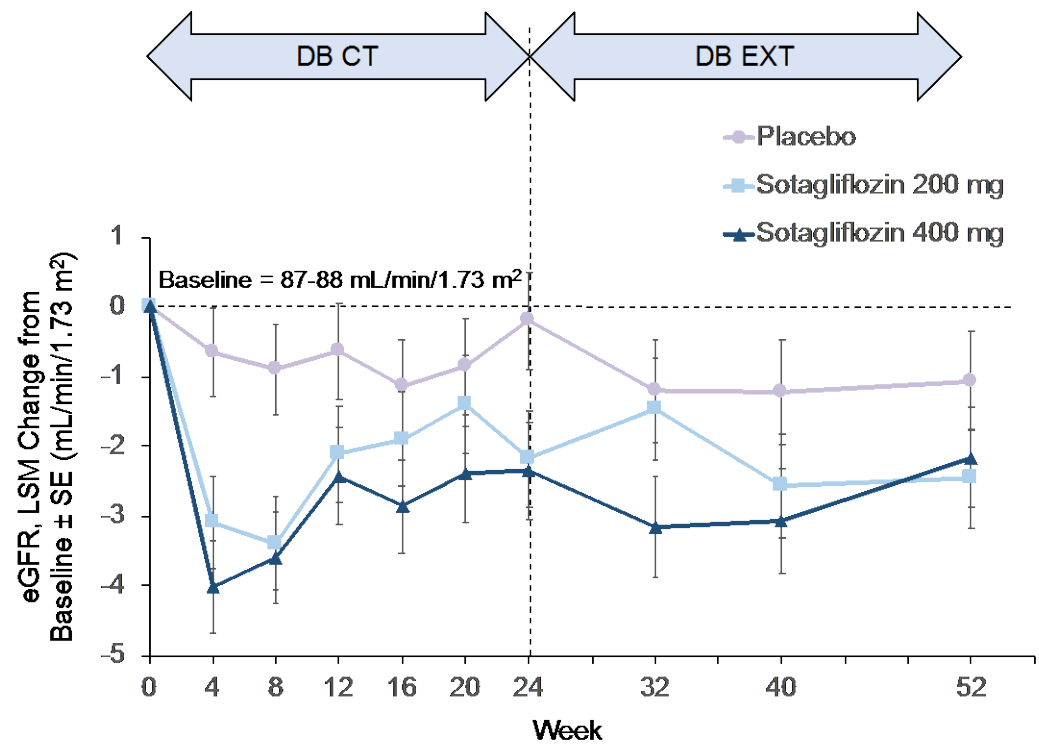

## SUPPLEMENTARY DATA

Figure 4. Overall summary of composite endpoints showing proportions of patients with A1C <7.0% who did not experience severe hypoglycemia (SH), diabetic ketoacidosis (DKA), weight gain, either weight gain or SH, or documented hypoglycemia  $\leq 3.0$  mmol/L at 24 weeks. \* $P < 0.05$  vs placebo.

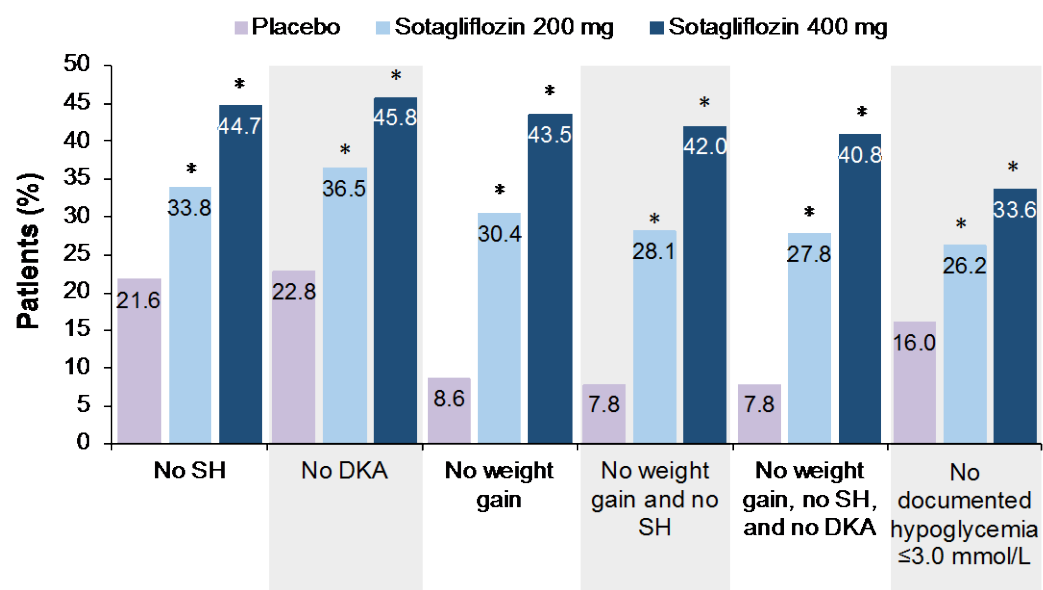



## SUPPLEMENTARY DATA

Figure 5. Proportions of patients with A1C <7.0%, severe hypoglycemia (SH), and/or diabetic ketoacidosis (DKA) at 24 weeks (A) and 52 weeks (B) and proportions of patients with a change in A1C  $\geq 0.5\%$ , severe hypoglycemia (SH), and/or diabetic ketoacidosis (DKA) at 24 weeks (C) and 52 weeks (D). Solid bars, A1C <7.0% (A, B) or  $\geq 0.5\%$  (C, D) without SH, without DKA, or without both SH and DKA; hatched bars, A1C <7.0% (A, B) or  $\geq 0.5\%$  (C, D) with SH or with DKA. Least squares mean (LSM) differences between treatment groups are shown as percentages (95% confidence intervals). PBO, placebo. S400, sotagliflozin 400 mg; S200, sotagliflozin 200 mg.

### A. Patients with A1C <7.0% with and without SH and DKA at 24 weeks

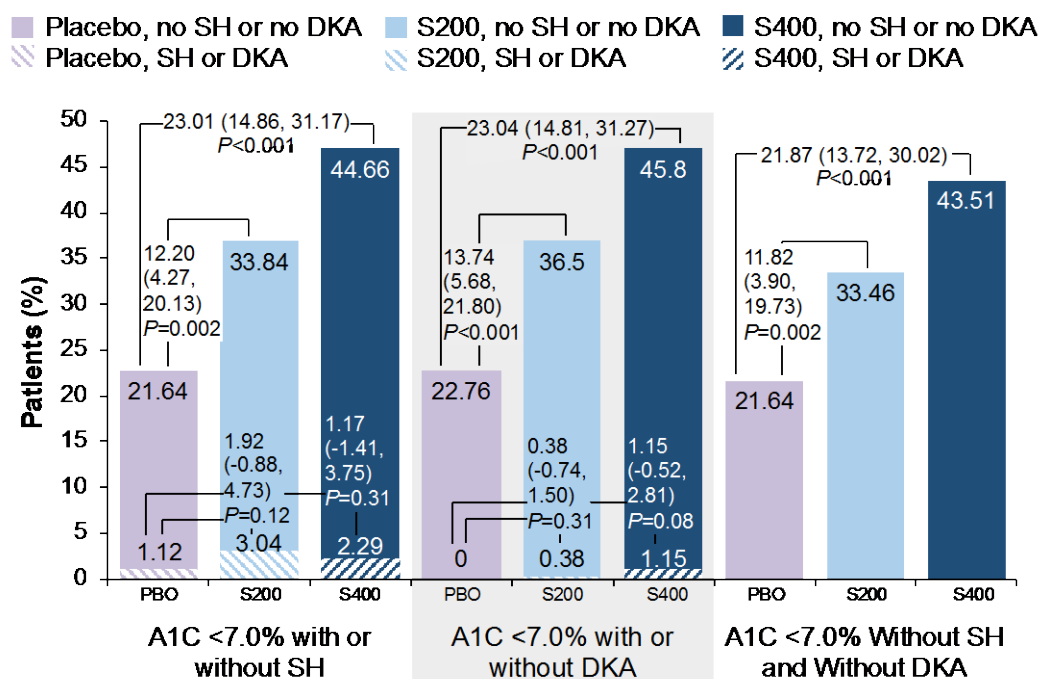

## SUPPLEMENTARY DATA

### B. Patients with A1C <7.0% with and without SH and DKA at 52 weeks

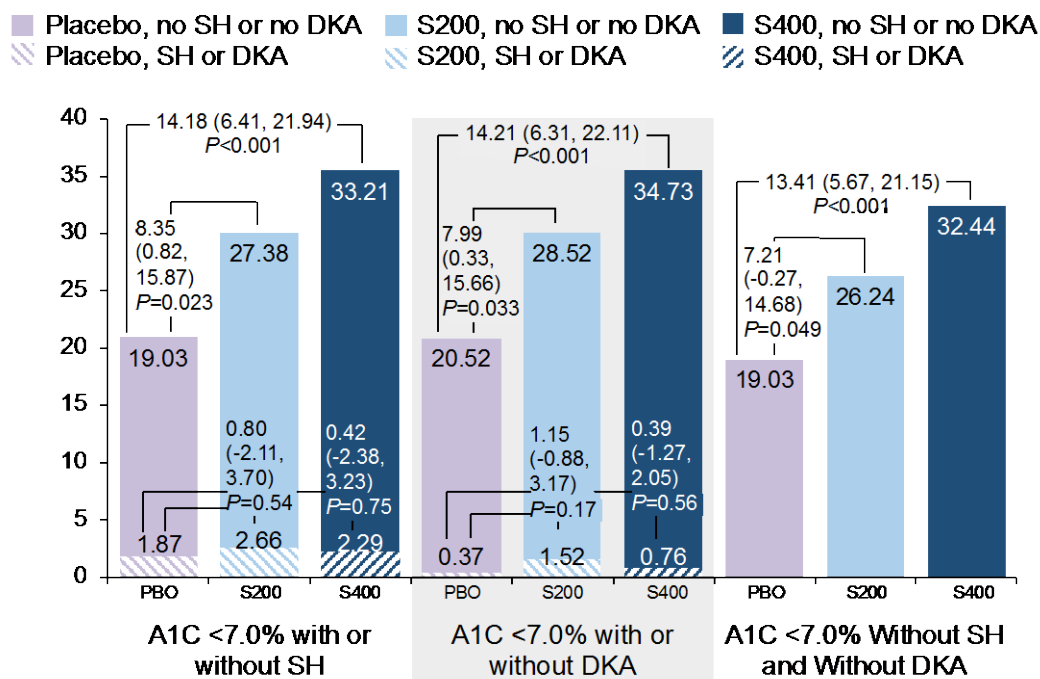

### C. Patients with A1C reduction ≥0.5% with and without SH and DKA at 24 weeks

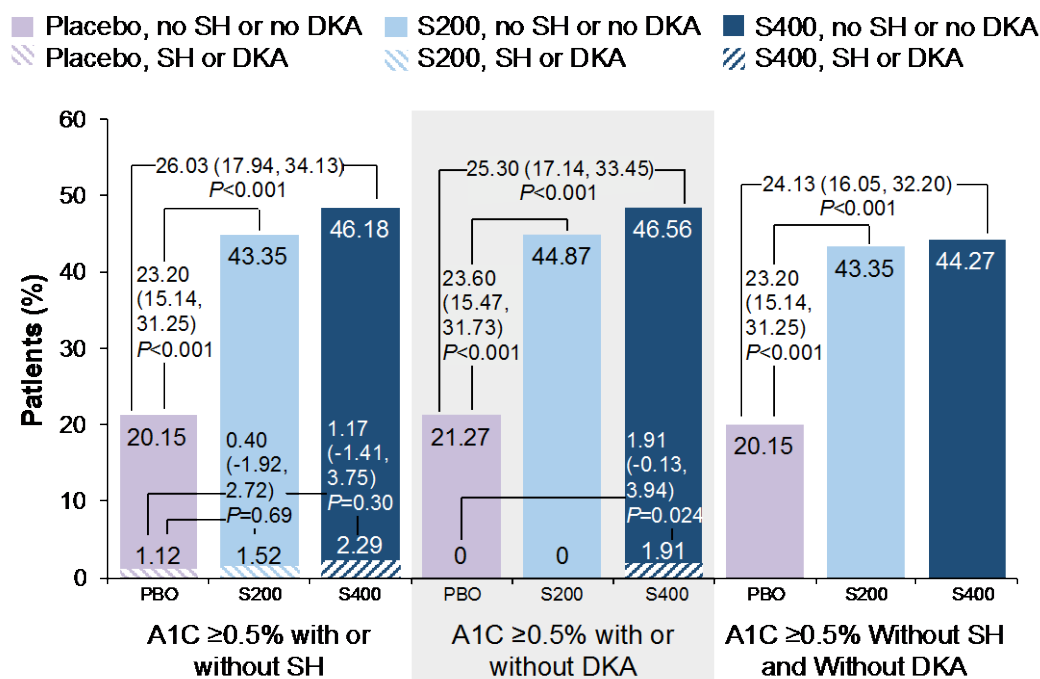

# SUPPLEMENTARY DATA

## D. Patients with A1C reduction $\geq 0.5\%$ with and without SH and DKA at 52 weeks

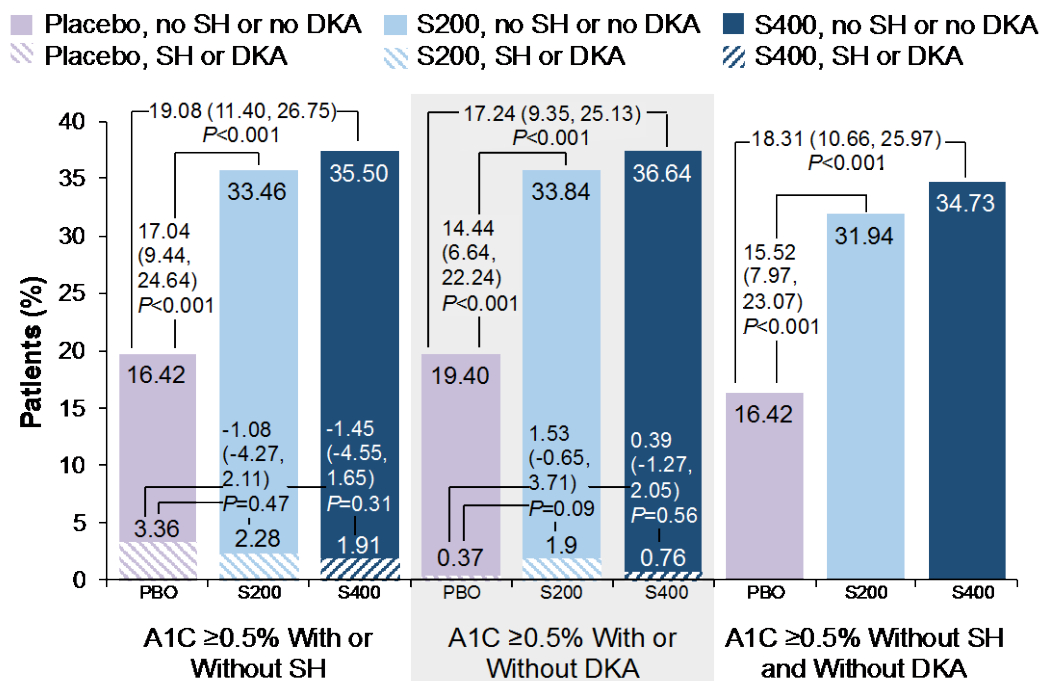

## SUPPLEMENTARY DATA

Figure 6. Proportions of patients meeting target A1C values who experienced weight gain; no weight gain; weight loss; no weight gain or severe hypoglycemia (SH); and no weight gain, no severe hypoglycemia, and no diabetic ketoacidosis (DKA). *A*: A1C <7.0% and weight effects at 24 weeks. *B*: A1C <7.0% and weight effects at 52 weeks. *C*: A1C reduction  $\geq 0.5\%$  and weight effects at 24 weeks. *D*: A1C reduction  $\geq 0.5\%$  and weight effects at 52 weeks. \* $P < 0.001$  vs placebo.  $^{\dagger}P < 0.05$  vs placebo. See Table 4 for LSM differences between treatment groups. PBO, placebo. S200, sotagliflozin 200 mg. S400, sotagliflozin 400 mg.

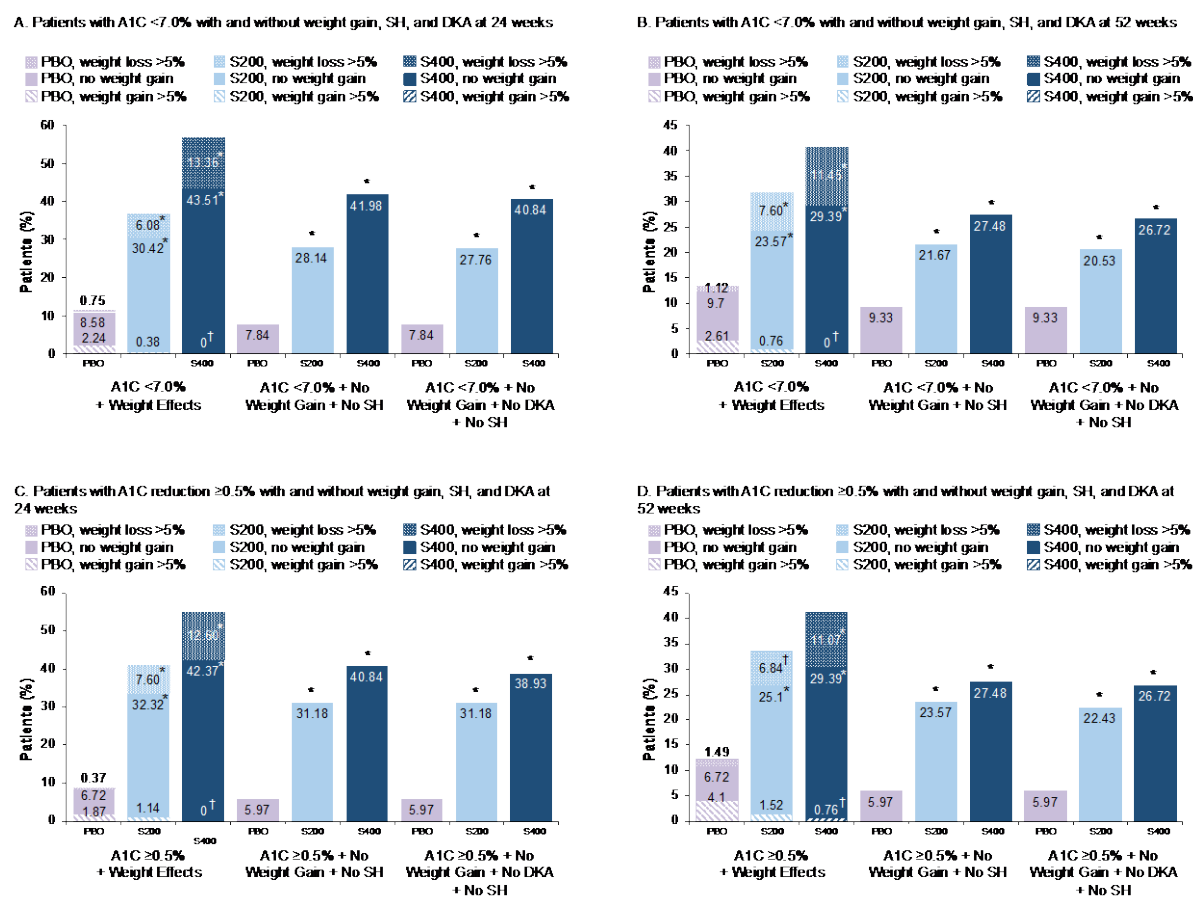

# SUPPLEMENTARY DATA

Table 4. Proportions of patients achieving selected composite outcomes.

| <b>Characteristic</b>                                       | <b>Placebo<br/>(n=268)<br/>n (%)</b> | <b>Sotagliflozin<br/>200 mg<br/>(n=263)<br/>n (%)</b> | <b>Percent<br/>difference from<br/>placebo (95%<br/>CI)<br/>P value</b> | <b>Sotagliflozin<br/>400 mg<br/>(n=262)<br/>n (%)</b> | <b>Percent<br/>difference from<br/>placebo (95%<br/>CI)<br/>P value</b> |
|-------------------------------------------------------------|--------------------------------------|-------------------------------------------------------|-------------------------------------------------------------------------|-------------------------------------------------------|-------------------------------------------------------------------------|
| <b>Patients achieving A1C &lt;7.0% at<br/>24 weeks and:</b> |                                      |                                                       |                                                                         |                                                       |                                                                         |
| Weight gain >5%                                             | 6 (2.24)                             | 1 (0.38)                                              | -1.86<br>(-4.16 to 0.44)<br>0.06                                        | 0                                                     | -2.24<br>(-4.39 to -0.09)<br>0.014                                      |
| No weight gain                                              | 23 (8.58)                            | 80 (30.42)                                            | 21.84<br>(14.97 to 28.71)<br><0.001                                     | 114 (43.51)                                           | 34.93<br>(27.68 to 42.18)<br><0.001                                     |
| Weight loss >5%                                             | 2 (0.75)                             | 16 (6.08)                                             | 5.34<br>(1.89 to 8.78)<br><0.001                                        | 35 (13.36)                                            | 12.61<br>(7.99 to 17.24)<br><0.001                                      |
| No severe hypoglycemia or<br>weight gain                    | 21 (7.84)                            | 74 (28.14)                                            | 20.30<br>(13.61 to 26.99)<br><0.001                                     | 110 (41.98)                                           | 34.15<br>(26.98 to 41.31)<br><0.001                                     |

## SUPPLEMENTARY DATA

| Characteristic                                                     | Placebo<br>(n=268)<br>n (%) | Sotagliflozin<br>200 mg<br>(n=263)<br>n (%) | Percent<br>difference from<br>placebo (95%<br>CI)<br><i>P</i> value | Sotagliflozin<br>400 mg<br>(n=262)<br>n (%) | Percent<br>difference from<br>placebo (95%<br>CI)<br><i>P</i> value |
|--------------------------------------------------------------------|-----------------------------|---------------------------------------------|---------------------------------------------------------------------|---------------------------------------------|---------------------------------------------------------------------|
| No severe hypoglycemia, DKA,<br>or weight gain                     | 21 (7.84)                   | 73 (27.76)                                  | 19.92<br>(13.25 to 26.59)<br><0.001                                 | 107 (40.84)                                 | 33.00<br>(25.86 to 40.15)<br><0.001                                 |
| <b>Patients achieving A1C reduction<br/>≥0.5% at 24 weeks and:</b> |                             |                                             |                                                                     |                                             |                                                                     |
| Weight gain >5%                                                    | 5 (1.87)                    | 3 (1.14)                                    | -0.72<br>(-3.17 to 1.72),<br>0.50                                   | 0                                           | -1.87<br>(-3.86 to 0.13)<br>0.027                                   |
| No weight gain                                                     | 18 (6.72)                   | 85 (32.32)                                  | 25.60<br>(18.83 to 32.38)<br><0.001                                 | 111 (42.37)                                 | 35.65<br>(28.58 to 42.72)<br><0.001                                 |
| Weight loss >5%                                                    | 1 (0.37)                    | 20 (7.60)                                   | 7.23<br>(3.57 to 10.89)<br><0.001                                   | 33 (12.60)                                  | 12.22<br>(7.76 to 16.68)<br><0.001                                  |
| No severe hypoglycemia or<br>weight gain                           | 16 (5.97)                   | 82 (31.18)                                  | 25.21<br>(18.56 to 31.86)<br><0.001                                 | 107 (40.84)                                 | 34.87<br>(27.90 to 41.84)<br><0.001                                 |

## SUPPLEMENTARY DATA

| Characteristic                                              | Placebo<br>(n=268)<br>n (%) | Sotagliflozin<br>200 mg<br>(n=263)<br>n (%) | Percent<br>difference from<br>placebo (95%<br>CI)<br><i>P</i> value | Sotagliflozin<br>400 mg<br>(n=262)<br>n (%) | Percent<br>difference from<br>placebo (95%<br>CI)<br><i>P</i> value |
|-------------------------------------------------------------|-----------------------------|---------------------------------------------|---------------------------------------------------------------------|---------------------------------------------|---------------------------------------------------------------------|
| No severe hypoglycemia, DKA,<br>or weight gain              | 16 (5.97)                   | 82 (31.18)                                  | 25.21<br>(18.56 to 31.86)<br><0.001                                 | 102 (38.93)                                 | 32.96<br>(26.03 to 39.89)<br><0.001                                 |
| <b>Patients achieving A1C &lt;7.0% at<br/>52 weeks and:</b> |                             |                                             |                                                                     |                                             |                                                                     |
| Weight gain >5%                                             | 7 (2.61)                    | 2 (0.76)                                    | -1.85<br>(-4.41 to 0.70)<br>0.10                                    | 0                                           | -2.61<br>(-4.90 to -0.33)<br>0.008                                  |
| No weight gain                                              | 26 (9.70)                   | 62 (23.57)                                  | 13.87<br>(7.26 to 20.48)<br><0.001                                  | 77 (29.39)                                  | 19.69<br>(12.75 to 26.62)<br><0.001                                 |
| Weight loss >5%                                             | 3 (1.12)                    | 20 (7.60)                                   | 6.49<br>(2.67 to 10.30)<br><0.001                                   | 30 (11.45)                                  | 10.33<br>(5.90 to 14.76)<br><0.001                                  |
| No severe hypoglycemia or<br>weight gain                    | 25 (9.33)                   | 57 (21.67)                                  | 12.34<br>(5.89 to 18.80)<br><0.001                                  | 72 (27.48)                                  | 18.15<br>(11.35 to 24.96)<br><0.001                                 |

SUPPLEMENTARY DATA

| Characteristic                                                     | Placebo<br>(n=268)<br>n (%) | Sotagliflozin<br>200 mg<br>(n=263)<br>n (%) | Percent<br>difference from<br>placebo (95%<br>CI)<br><i>P</i> value | Sotagliflozin<br>400 mg<br>(n=262)<br>n (%) | Percent<br>difference from<br>placebo (95%<br>CI)<br><i>P</i> value |
|--------------------------------------------------------------------|-----------------------------|---------------------------------------------|---------------------------------------------------------------------|---------------------------------------------|---------------------------------------------------------------------|
| No severe hypoglycemia, DKA,<br>or weight gain                     | 25 (9.33)                   | 54 (20.53)                                  | 11.20<br>(4.83 to 17.58)<br><0.001                                  | 70 (26.72)                                  | 17.39<br>(10.62 to 24.16)<br><0.001                                 |
| <b>Patients achieving A1C reduction<br/>≥0.5% at 52 weeks and:</b> |                             |                                             |                                                                     |                                             |                                                                     |
| Weight gain >5%                                                    | 11 (4.10)                   | 4 (1.52)                                    | -2.58<br>(-5.76 to 0.59)<br>0.08                                    | 2 (0.76)                                    | -3.34<br>(-6.32 to -0.37)<br>0.015                                  |
| No weight gain                                                     | 18 (6.72)                   | 66 (25.10)                                  | 18.38<br>(11.97 to 24.79)<br><0.001                                 | 77 (29.39)                                  | 22.67<br>(16.02 to 29.33)<br><0.001                                 |
| Weight loss >5%                                                    | 4 (1.49)                    | 18 (6.84)                                   | 5.35<br>(1.60 to 9.11)<br>0.002                                     | 29 (11.07)                                  | 9.58<br>(5.13 to 14.02)<br><0.001                                   |
| No severe hypoglycemia or<br>weight gain                           | 16 (5.97)                   | 62 (23.57)                                  | 17.60<br>(11.37 to 23.84)<br><0.001                                 | 72 (27.48)                                  | 21.51<br>(15.03 to 27.99)<br><0.001                                 |



# SUPPLEMENTARY DATA

| Characteristic                                 | Placebo<br>(n=268)<br>n (%) | Sotagliflozin<br>200 mg<br>(n=263)<br>n (%) | Percent<br>difference from<br>placebo (95%<br>CI)<br><i>P</i> value | Sotagliflozin<br>400 mg<br>(n=262)<br>n (%) | Percent<br>difference from<br>placebo (95%<br>CI)<br><i>P</i> value |
|------------------------------------------------|-----------------------------|---------------------------------------------|---------------------------------------------------------------------|---------------------------------------------|---------------------------------------------------------------------|
| No severe hypoglycemia, DKA,<br>or weight gain | 16 (5.97)                   | 59 (22.43)                                  | 16.46<br>(10.30 to 22.62)<br><0.001                                 | 70 (26.72)                                  | 20.75<br>(14.31 to 27.19)<br><0.001                                 |

\*The treatment effect for the primary endpoint is expressed as the sotagliflozin plus or minus placebo difference in binomial proportions (expressed as a percentage) and the accompanying 95% confidence interval (CI).

## SUPPLEMENTARY DATA

Figure 7. LS Mean change from baseline in DTSQs total score at week 24.

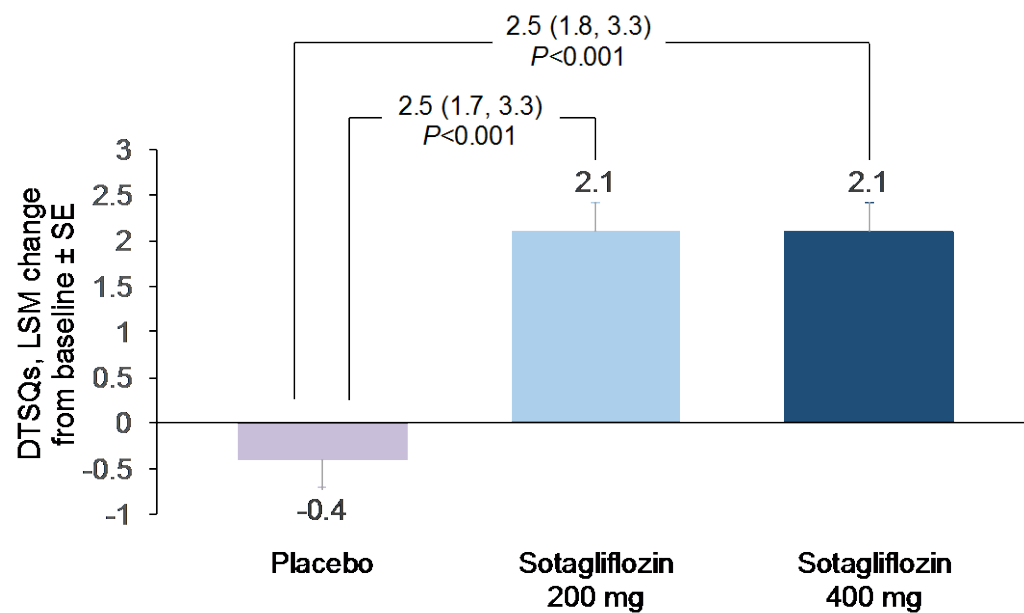

Figure 8. Mean change from baseline in DDS2 total score by study visit.

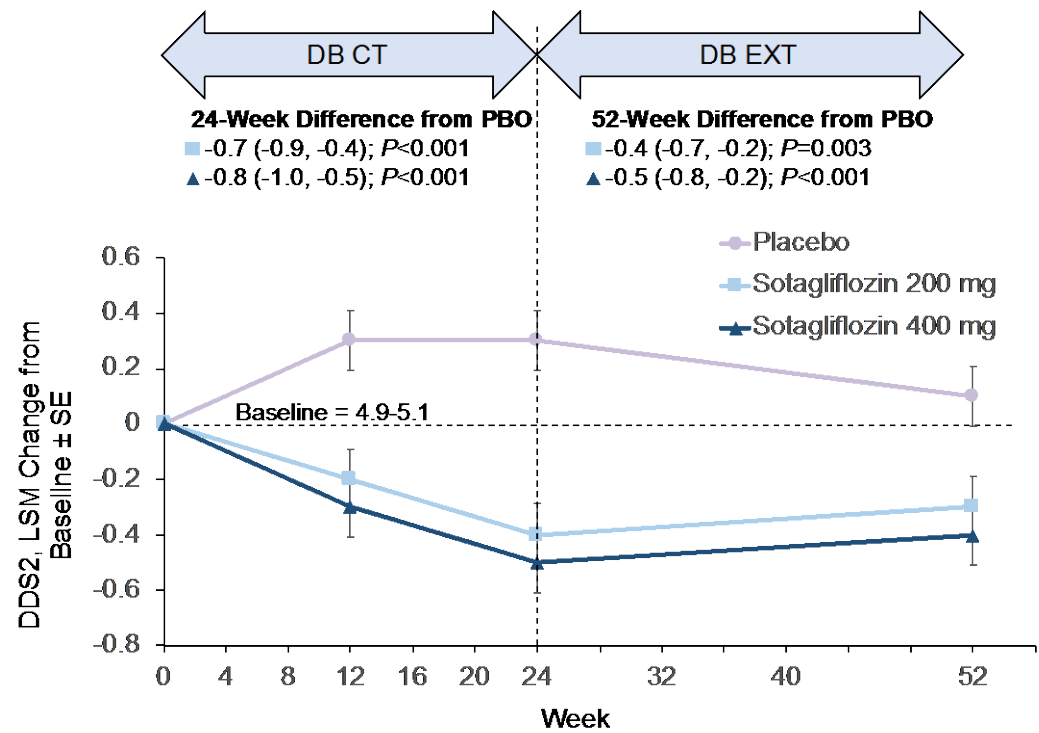

# SUPPLEMENTARY DATA

Table 5. Acidosis-related events (baseline to 52 weeks).

| <b>Events, no. patients (%)</b>                                               | <b>Placebo<br/>(n=268)</b> | <b>Sotagliflozin 200<br/>mg<br/>(n=263)</b> | <b>Sotagliflozin 400<br/>mg<br/>(n=262)</b> |
|-------------------------------------------------------------------------------|----------------------------|---------------------------------------------|---------------------------------------------|
| Acidosis-related adverse events                                               | 11 (4.1)                   | 28 (10.6)                                   | 43 (16.4)                                   |
| Nonserious acidosis-related adverse events                                    | 8 (3.0)                    | 15 (5.7)                                    | 31 (11.8)                                   |
| Serious acidosis-related adverse events                                       | 3 (1.1)                    | 13 (4.9)                                    | 14 (5.3)                                    |
| Positively adjudicated metabolic acidosis                                     | 3 (1.1)                    | 10 (3.8)                                    | 12 (4.6)                                    |
| Positively adjudicated metabolic acidosis that was also diabetic ketoacidosis | 1 (0.4)                    | 9 (3.4)                                     | 11 (4.2)                                    |
| Adjudicated diabetic ketoacidosis events* occurring at                        |                            |                                             |                                             |
| BG >13.9 mmol/L<br>(>250 mg/dL)                                               | 1                          | 5                                           | 9                                           |
| BG ≥8.3-13.9 mmol/L<br>(≥150-250 mg/dL)                                       | 0                          | 5                                           | 2                                           |
| BG <8.3 mmol/L<br>(<150 mg/dL)                                                | 0                          | 0                                           | 0                                           |

BG = blood glucose.

\*A total of 22 DKA events occurred in 21 patients. One patient in the sotagliflozin 200 mg group had 2 events.

SUPPLEMENTARY DATA

Figure 9. Boxplot of beta-hydroxy butyrate (mmol/L) at baseline and week 24. Mean values are represented by triangles (sotagliflozin 400 mg), squares (sotagliflozin 200 mg), or circles (placebo). Bottom and top of box are first and third quartiles, respectively. Band inside the box represents median values. Bottom and top whiskers are the minimum and maximum, respectively. All medians were <0.2 mmol/L at the end of double-blind treatment, and the means reflected an increase of ~0.1 mmol/L from baseline.

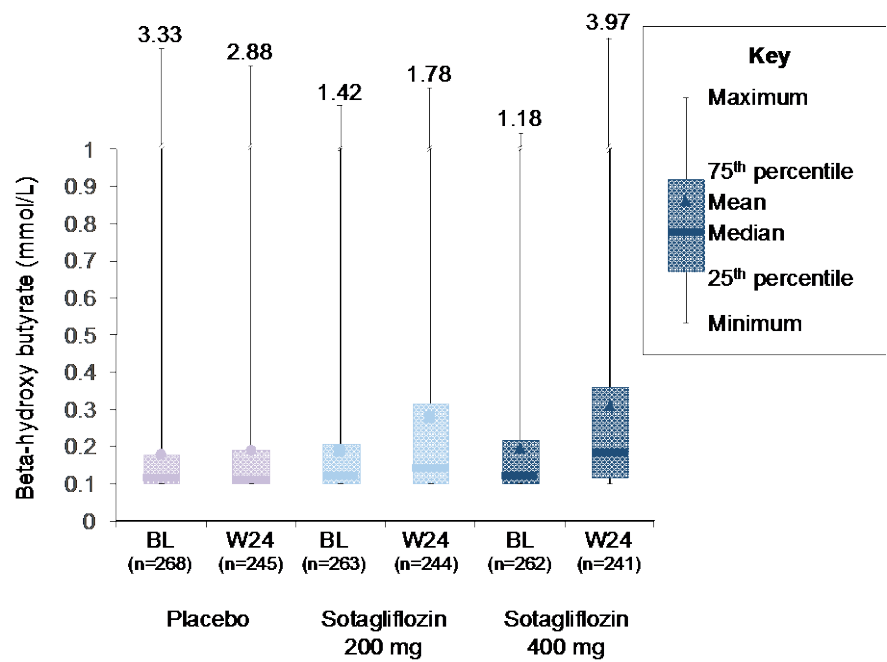

Supplement: dc180343supplementarydata.pdf [file dc180343supplementarydata.pdf]
